# Supplementary material
Source: PubMed Central journal article supplement (PMC7611211)
Supplement: EMS128768-supplement-Supplemental_Material.pdf [file EMS128768-supplement-Supplemental_Material.pdf]

## Supplemental Material

### Supplemental Methods

#### Key resources

| Reagent or Resource                                 | Source                                          | Resource Identifier (RRID) or Cat # |
|-----------------------------------------------------|-------------------------------------------------|-------------------------------------|
| <b>Antibodies</b>                                   |                                                 |                                     |
| 6-phosphofructokinase/ fructose-2,6-biphosphatase 3 | Cell Signalling Technology, Leiden, Netherlands | RRID:AB_2617178                     |
| Aldolase (C)                                        | Abcam, Cambridge, U.K.                          | RRID:AB_2040466                     |
| Anti-mouse HRP                                      | Thermo Fisher, Loughborough, U.K.               | RRID:AB_933708                      |
| Anti-rabbit HRP                                     | Thermo Fisher, Loughborough, U.K.               | RRID:AB_933633                      |
| Beta actin                                          | Abcam, Cambridge, U.K.                          | RRID:AB_722536                      |
| p-AMPK                                              | Cell Signalling Technology, Leiden, Netherlands | RRID:AB_331250                      |
| AMPK                                                | Cell Signalling Technology, Leiden, Netherlands | RRID:AB_490795                      |
| CD34-PE                                             | BD Biosciences, U.K.                            | RRID:AB_400371                      |
| CD45-PerCP                                          | Abcam, Cambridge, U.K.                          | RRID:AB_1139693                     |
| Enolase 1                                           | Cell Signalling Technology, Leiden, Netherlands | RRID:AB_2246524                     |
| Fructose-1,6-bisphosphatase 1                       | Abcam, Cambridge, U.K.                          | RRID:AB_10864942                    |
| Glucose transporter 3                               | Abcam, Cambridge, U.K.                          | RRID:AB_2736916                     |
| Glucose transporter 5                               | Abcam, Cambridge, U.K.                          | RRID:AB_732614                      |
| Glyceraldehyde-3-phosphate dehydrogenase            | Cell Signalling Technology, Leiden, Netherlands | RRID:AB_10622025                    |
| hCD33-APC                                           | Biolegend, U.K.                                 | RRID: AB_2565753                    |
| hCD45-FITC,                                         | Biolegend, U.K.                                 | RRID: AB_314393                     |
| Hexokinase 1                                        | Cell Signalling Technology, Leiden, Netherlands | RRID:AB_2116996                     |
| Histone H1                                          | Serotec, Oxford U.K.                            | RRID:AB_2114841                     |
| H-RAS                                               | Santa-Cruz, Heidelberg, Germany                 | RRID:AB_631670                      |
| Hypoxia-inducible factor 1-alpha                    | BD Biosciences                                  | RRID:AB_398271                      |
| Lactate dehydrogenase (A)                           | Cell Signalling Technology, Leiden, Netherlands | RRID:AB_2137173                     |
| mCD45-PerCP-Cy5.5                                   | Biolegend, U.K.                                 | RRID: AB_893340                     |
| Monocarboxylate transporter 4                       | Abcam, Cambridge, U.K.                          | RRID:AB_2050317                     |
| NOX2-PE                                             | MBL Life science Nagoya, Japan,                 | RRID:AB_591389                      |
| N-RAS                                               | Merck Milipore, Feltham, U.K.                   | RRID: AB_10683217                   |
| p38 <sup>MAPK</sup>                                 | Cell Signalling Technology, Leiden, Netherlands | RRID:AB_330713                      |

| Reagent or Resource                                    | Source                                          | Resource Identifier (RRID) or Cat # |
|--------------------------------------------------------|-------------------------------------------------|-------------------------------------|
| Phosphofructokinase (P)                                | Cell Signalling Technology, Leiden, Netherlands | RRID:AB_2736917                     |
| Phosphoglucose isomerase                               | Abcam, Cambridge, U.K.                          | RRID: AB_2736921                    |
| Phosphoglycerate kinase                                | Abcam, Cambridge, U.K.                          | RRID: AB_2736923                    |
| Phosphoglycerate mutase 1                              | Cell Signalling Technology, Leiden, Netherlands | RRID: AB_2736922                    |
| Phospho-p38 <sup>MAPK</sup>                            | Cell Signalling Technology, Leiden, Netherlands | RRID:AB_331641                      |
| Pyruvate kinase (M) 1                                  | Cell Signalling Technology, Leiden, Netherlands | RRID: AB_2715534                    |
| Pyruvate kinase (M) 2                                  | Cell Signalling Technology, Leiden, Netherlands | RRID: AB_1904096                    |
| Phospho S6K1                                           | Cell Signalling Technology, Leiden, Netherlands | RRID:AB_2285392                     |
| Total S6K1                                             | Cell Signalling Technology, Leiden, Netherlands | RRID:AB_331676                      |
| Triphosphate isomerase                                 | Abcam, Cambridge, U.K.                          | RRID: AB_2736924                    |
| $\alpha$ -Tubulin                                      | Abcam, Cambridge, U.K.                          | RRID: AB_869989                     |
| UCP (D105V)                                            | Cell Signalling Technology, Leiden, Netherlands | RRID: AB_2721818                    |
| <b>Chemical, Peptides, Recombinant proteins</b>        |                                                 |                                     |
| 2-NBDG                                                 | Life Technologies, Glasgow, U.K.                | Cat # N13195                        |
| 3-PO                                                   | Axon Medchem, Groningen, Netherlands            | Cat # AXON2175                      |
| Diogenes <sup>TM</sup>                                 | GeneFlow, Staffordshire U.K.                    | Cat # A2-0092                       |
| Diphenyleneiodonium                                    | Sigma-Aldrich, Poole, U.K.                      | Cat # D2926                         |
| Glucose Oxidase                                        | Sigma-Aldrich, Poole, U.K.                      | Cat # G6766                         |
| Granulocyte Colony-Stimulating Factor                  | Biolegend, U.K.                                 | Cat # 578602                        |
| Human Fms-like tyrosine kinase-3 ligand                | Biolegend, U.K.                                 | Cat # 710802                        |
| Human Granulocyte-Macrophage Colony Stimulating Factor | Biolegend, U.K.                                 | Cat # 572902                        |
| Human interleukin-3                                    | Biolegend, U.K.                                 | Cat # 578004                        |
| Human interleukin-6                                    | Biolegend, U.K.                                 | Cat # 570802                        |
| Human Stem Cell Factor                                 | Biolegend, U.K.                                 | Cat # 573902                        |
| Human Transferrin                                      | Sigma-Aldrich, Poole, U.K.                      | Cat # 10652202001                   |
| Lipofectamine 2000                                     | Invitrogen, Paisley, U.K.                       | Cat # 11668019                      |
| PEGylated Catalase                                     | Sigma-Aldrich, Poole, U.K.                      | Cat # C4963                         |
| PFK158                                                 | Axon Medchem, Groningen, Netherlands            | Cat # AXON2542                      |
| Recombinant HIF1 $\alpha$                              | Abcam, Cambridge, UK                            | Cat # ab154478                      |
| Retronectin <sup>®</sup>                               | Takara Bio, Paris, France                       | Cat # T100A/B                       |
| Trizol                                                 | Life Technologies, Glasgow, U.K.                | Cat # 15596026                      |

| Reagent or Resource                                                   | Source                                                                                           | Resource Identifier (RRID) or Cat # |
|-----------------------------------------------------------------------|--------------------------------------------------------------------------------------------------|-------------------------------------|
| UR13756                                                               | Gift of Dr Davis, Cardiff University, U.K.                                                       | N/A                                 |
| VAS-2870                                                              | ENZO-life sciences, Exeter, U.K                                                                  | Cat # 19205                         |
| <b>Commercial Assays</b>                                              |                                                                                                  |                                     |
| Ambion WT Expression Kit                                              | Ambion and CBS services Cardiff U.K.                                                             | N/A                                 |
| CD34+ Isolation Kit                                                   | Miltenyi Biotec, Bisley, U.K.                                                                    | Cat # 130-046-701                   |
| CellTiter-Glo®                                                        | Promega, Southampton, U.K.                                                                       | Cat # G7570                         |
| D-Glucose Assay Kit                                                   | Abcam, Cambridge, U.K.                                                                           | Cat # ab136956                      |
| ECL Detection Kit                                                     | Life Technologies, Glasgow, U.K                                                                  | Cat # 12994780                      |
| GeneChip® Human Exon 1.0 <sup>ST</sup>                                | Affymetrix; Thermo Fisher, Loughborough, U.K.                                                    | Cat # 900651                        |
| L-Lactate Assay Kit                                                   | Abcam, Cambridge, U.K.                                                                           | Cat # ab65330                       |
| Metabolomics                                                          | Metabolon <sup>TM</sup><br>( <a href="http://www.metabolon.com/">http://www.metabolon.com/</a> ) | N/A                                 |
| NOVEX western blotting                                                | Life Technologies, Glasgow, U.K                                                                  | N/A                                 |
| <b>Deposited Data</b>                                                 |                                                                                                  |                                     |
| Affymetrix Microarray                                                 | ArrayExpress                                                                                     | e-mexp-583                          |
| <b>Experimental Models: Cell lines</b>                                |                                                                                                  |                                     |
| Human: 293T                                                           | ATCC, Middlesex, U.K.                                                                            | RRID:CVCL_0063                      |
| Human: Mv4;11                                                         | ATCC, Middlesex, U.K.                                                                            | RRID:CVCL_0064                      |
| Human: Phoenix                                                        | gift of Garry Nolan, Stanford University School of Medicine, Stanford                            | RRID:CVCL_H716                      |
| Human: THP-1                                                          | ECACC, Porton Down, Salisbury, UK                                                                | RRID:CVCL_0006                      |
| <b>Experimental Models: Organisms/Strains</b>                         |                                                                                                  |                                     |
| NSG<br>(NOD.Cg-Prkdc <sup>scid</sup><br>Il2rg <sup>tm1Wjl/SzJ</sup> ) | Jackson Laboratory                                                                               | RRID:IMSR_JAX:005557                |
| MRP8-NRAS <sup>G12D</sup>                                             | Kind gift of Dr Omidvar, Cardiff University, U.K.                                                | N/A                                 |
| <b>Experimental Models: Human primary cells</b>                       |                                                                                                  |                                     |
| Human Cord Blood                                                      | University Hospital Wales, U.K.                                                                  | N/A                                 |
| Primary AML Patient Blasts                                            | UK MRC/NCRI AML 14-17 clinical trials, Cardiff University, U.K.                                  | N/A                                 |
| <b>Recombinant DNA</b>                                                |                                                                                                  |                                     |
| GFP-PINCO                                                             | Pier Pelicci, European Institute of Oncology, Milan, Italy (1)                                   | N/A                                 |

| Reagent or Resource            | Source                               | Resource Identifier (RRID) or Cat # |
|--------------------------------|--------------------------------------|-------------------------------------|
| H-RAS <sup>G12V</sup> – PINCO  | Prof Darley (Cardiff University, UK) | N/A                                 |
| N-RAS <sup>G12D</sup> – PINCO  | Prof Darley (Cardiff University, UK) | N/A                                 |
| PFKFB3                         | Eurofins MWG, Eberserg, Germany      | N/A                                 |
| shRNA control TRC2             | Mission® Sigma, Dorset, U.K.         | Cat # SHC202                        |
| shRNA HIF1 $\alpha$ (1)        | Mission® Sigma, Dorset, U.K.         | TRC2 N0000010819                    |
| shRNA HIF1 $\alpha$ (2)        | Mission® Sigma, Dorset, U.K.         | TRC2 N0000003810                    |
| shRNA HIF1 $\alpha$ (3)        | Mission® Sigma, Dorset, U.K.         | TRC2 N0000003808                    |
| shRNA PFKFB3 (1)               | Mission® Sigma, Dorset, U.K.         | TRC2 N0000314690                    |
| shRNA PFKFB3 (2)               | Mission® Sigma, Dorset, U.K.         | TRC2 N0000314746                    |
| shRNA PFKFB3 (3)               | Mission® Sigma, Dorset, U.K.         | TRC2 N0000314747                    |
| shRNA PFKFB3 (4)               | Mission® Sigma, Dorset, U.K.         | TRC2 N0000314748                    |
| shRNA PFKFB3 (5)               | Mission® Sigma, Dorset, U.K.         | TRC2 N0000381874                    |
| <b>Software and Algorithms</b> |                                      |                                     |
| AIDA Image Analyser            | Raytest, Straubenhardt, Germany      | RRID:SCR_014440                     |
| FCS express v6                 | DeNovos Software, California, U.S.A  | RRID:SCR_016431                     |
| Minitab v19                    | Minitab Ltd, Coventry, U.K.          | RRID: SCR_014483                    |
| Partek Genomics Suite 6.0      | Partek Inc U.S.A                     | RRID:SCR_011860                     |

### **Affymetrix microarray analysis**

RNA from transduced cultures were extracted and processed for hybridisation to Affymetrix GeneChip Human Exon 1.0 ST Array for whole-transcript expression analysis. All Exon array data were analysed using Partek Genomics Suite Software (Version 6.6; Partek Inc., MO, USA). For Partek analyses CEL files were imported using Affymetrix annotation files (NetAffx, Version na31. hg19). Exon-level data were filtered to include only those probe sets that are in the “core” meta-probe list which refers to probe sets that are supported by the most reliable evidence from RefSeq and full-length mRNA GenBank records containing complete CDS information. The core data include target-sequence, perfect-match, unique probe sets. For the supervised analysis, the “Full” probe data set was used and filtered to include only annotations that were characterised as involved in “glucose metabolism”. The RMA algorithm was used for Exon-level expression analysis. Adjustments were made for GC content and probe sequence on pre-background-

subtracted values. We used background correction, quantile normalization,  $\log_2$  transformation, and median polishing for summarization. All image plots passed visual inspection. Hybridization controls had signal increases following concentration. Labelling control signal strengths followed the order Lys < Phe < Thr < Dap. Signal histograms and box plots were examined for raw and processed data.

The Affymetrix data for HSPC is available as supplemental material at <https://www.ebi.ac.uk/arrayexpress> (accession number e-mexp-583). A two-arm approach was applied in order to identify statistically differentially regulated genes. Firstly, statistically significant changing genes were identified using a paired t-test or 2-way ANOVA based on the following model;  $Y_{ijk} = \mu + \text{Condition}_i + \text{Cord blood replicate}_j + \varepsilon_{ijk}$ . Where  $Y_{ijk}$  represents the  $k^{\text{th}}$  observation on the  $i^{\text{th}}$  Condition  $j^{\text{th}}$  Cord blood replicate;  $\mu$  is the common effect for the whole experiment;  $\varepsilon^{ijk}$  represents the random error present in the  $k^{\text{th}}$  observation on the  $i^{\text{th}}$  Condition  $j^{\text{th}}$  Cord blood replicate. The errors  $\varepsilon^{ijk}$  are assumed to be normally and independently distributed with mean 0 and standard deviation  $\delta$  for all measurements. Cord blood replicate is a random effect and Condition represents experimental treatment e.g. mutant N-Ras<sup>G12D</sup>. Fisher's Least Significant Difference (LSD) was performed for the following contrasts i) mutant N-RAS<sup>G12D</sup> vs controls (GFP alone) or (ii) N-RAS<sup>G12D</sup> vs N-RAS<sup>G12D</sup>+DPI or (iii) GFP alone vs GFP alone +DPI (Figure 1A). Where possible the Benjamini-Hochberg multiple testing correction was applied to both these strategies, otherwise the level of significance was reduced to  $P < 0.01$ . Statistically significant genes were filtered to remove all genes that changed by less than 1.2-fold in each of the contrasts above. To identify mutant N-RAS<sup>G12D</sup> gene changes that are mediated via ROS, the gene lists outlined above were combined in a Venn diagram to identify biological and statistically significant changing according to Figure 1A. Gene enrichment analysis was used to interpret the biological impact of differential gene expression of cells 'exposed' to oxidative stress. Gene Ontology (GO) enrichment analysis was undertaken using Metacore Pathway Analysis (Metacore<sup>TM</sup>, Clarivate Analytics).

**Supplemental Tables**



**Supplemental Table S1. Comparison of gene changes in human hematopoietic cord blood (CD34<sup>+</sup>) mixed progenitor cells transduced with N-RAS<sup>G12D</sup> or control (expressing GFP alone). Microarray analyses were performed using Affymetrix Human Gene 1.0<sup>ST</sup> Genechips®.**

| Transcript ID | Gene Assignment (RefSeq ID) | Common Gene Name | p-value     | Regulation (Fold-Change) | Regulation            | Gene Ontology (GO) Accession number | GO Biological Process                                  |
|---------------|-----------------------------|------------------|-------------|--------------------------|-----------------------|-------------------------------------|--------------------------------------------------------|
| 2949299       | ENST00000383413             | LY6G6C           | 3.33E-08    | -9.30178                 | Control down vs N-RAS |                                     |                                                        |
| 3455890       | NM_175834                   | KRT79            | 7.69E-06    | -8.29868                 | Control down vs N-RAS |                                     |                                                        |
| 3360456       | NM_001005567                | OR51B5           | 1.03E-09    | -4.82082                 | Control down vs N-RAS | GO:0007608                          | sensory perception of smell                            |
| 2735027       | NM_001251830                | SPP1             | 7.98E-05    | -4.4816                  | Control down vs N-RAS | GO:0001503                          | ossification                                           |
| 3558375       | ENST00000216341             | GZMB             | 3.48E-06    | -4.34065                 | Control down vs N-RAS | GO:0006508                          | proteolysis                                            |
| 3178147       | NM_001257971                | CTSL1            | 2.57E-05    | -4.25934                 | Control down vs N-RAS | GO:0002250                          | adaptive immune response                               |
| 4026010       | NM_004961                   | GABRE            | 1.01E-05    | -3.78265                 | Control down vs N-RAS | GO:0006810                          | transport                                              |
| 2953570       | NM_018643                   | TREM1            | 0.000608837 | -3.56154                 | Control down vs N-RAS | GO:0006959                          | humoral immune response                                |
| 7385547       | NM_002982                   | CCL2             | 0.000259351 | -3.49656                 | Control down vs N-RAS | GO:0000165                          | MAPK cascade                                           |
| 3016148       | NM_000602                   | SERPINE1         | 1.00E-04    | -3.24133                 | Control down vs N-RAS | GO:0000302                          | response to reactive oxygen species                    |
| 3456688       | NM_020370                   | GPR84            | 1.29E-05    | -3.22181                 | Control down vs N-RAS | GO:0008150                          | biological_process                                     |
| 3788976       | NM_004163                   | RAB27B           | 4.15E-06    | -3.2184                  | Control down vs N-RAS | GO:0006184                          | GTP catabolic process                                  |
| 3403015       | NM_001975                   | ENO2             | 5.08E-05    | -3.18563                 | Control down vs N-RAS | GO:0005975                          | carbohydrate metabolic process                         |
| 4011008       | NM_001184830                | VSIG4            | 0.000225672 | -3.07449                 | Control down vs N-RAS | GO:0006957                          | Complement activation                                  |
| 2879105       | NM_030964                   | SPRY4            | 3.35E-07    | -3.03003                 | Control down vs N-RAS | GO:0007275                          | multicellular organismal development                   |
| 3464860       | ENST00000279488             | DUSP6            | 1.05E-05    | -2.94658                 | Control down vs N-RAS | GO:0000188                          | inactivation of MAPK activity                          |
| 2671728       | NM_022842                   | CDCP1            | 2.91E-07    | -2.80654                 | Control down vs N-RAS |                                     |                                                        |
| 3654956       | NM_014387                   | LAT              | 4.28E-06    | -2.63323                 | Control down vs N-RAS | GO:0006955                          | immune response                                        |
| 2571510       | ENST00000263341             | IL1B             | 0.000163903 | -2.63164                 | Control down vs N-RAS | GO:0000165                          | MAPK cascade                                           |
| 3870758       | ENST00000570517             | LILRA5           | 0.00048616  | -2.46687                 | Control down vs N-RAS | GO:0045087                          | innate immune response                                 |
| 3091699       | NM_006228                   | PNOC             | 1.56E-07    | -2.3913                  | Control down vs N-RAS | GO:0007165                          | signal transduction                                    |
| 2358693       | ENST00000368921             | MLLT11           | 1.43E-07    | -2.36277                 | Control down vs N-RAS | GO:0043065                          | positive regulation of apoptotic process               |
| 2692816       | ENST00000296181             | ITGB5            | 3.60E-07    | -2.34162                 | Control down vs N-RAS | GO:0002474                          | antigen processing and presentation of peptide antigen |
| 3662201       | NM_005951                   | MT1H             | 0.000286967 | -2.31976                 | Control down vs N-RAS | GO:0045926                          | negative regulation of growth                          |



| Transcript ID | Gene Assignment (RefSeq ID) | Common Gene Name | p-value     | Regulation (Fold-Change) | Regulation            | Gene Ontology (GO) Accession number | GO Biological Process                                  |
|---------------|-----------------------------|------------------|-------------|--------------------------|-----------------------|-------------------------------------|--------------------------------------------------------|
| 2699564       | NM_182943                   | PLOD2            | 0.000118111 | -2.31709                 | Control down vs N-RAS | GO:0001666                          | response to hypoxia                                    |
| 2773358       | NM_002704                   | PPBP             | 8.38E-05    | -2.3003                  | Control down vs N-RAS | GO:0002576                          | platelet degranulation                                 |
| 2453307       | NM_001773                   | CD34             | 5.73E-07    | -2.29289                 | Control down vs N-RAS | GO:0001894                          | tissue homeostasis                                     |
| 3507282       | NM_002019                   | FLT1             | 7.77E-05    | -2.28605                 | Control down vs N-RAS | GO:0000186                          | activation of MAPKK activity                           |
| 3724545       | NM_000212                   | ITGB3            | 8.50E-07    | -2.24124                 | Control down vs N-RAS | GO:0001934                          | positive regulation of protein phosphorylation         |
| 4012178       | ENST00000453707             | CITED1           | 1.05E-06    | -2.23623                 | Control down vs N-RAS | GO:0001656                          | metanephros development                                |
| 3905875       | ENST00000373313             | MAFB             | 4.44E-06    | -2.22667                 | Control down vs N-RAS | GO:0006351                          | transcription, DNA-dependent                           |
| 2709132       | NM_004454                   | ETV5             | 1.29E-06    | -2.21491                 | Control down vs N-RAS | GO:0006355                          | regulation of transcription, DNA-dependent             |
| 2818517       | NM_004385                   | VCAN             | 0.000306268 | -2.20059                 | Control down vs N-RAS | GO:0007155                          | cell adhesion                                          |
| 3901055       | NM_012072                   | CD93             | 1.20E-07    | -2.16681                 | Control down vs N-RAS | GO:0006909                          | phagocytosis                                           |
| 2527747       | NM_000578                   | SLC11A1          | 6.77E-05    | -2.14937                 | Control down vs N-RAS | GO:0000060                          | protein import into nucleus, translocation             |
| 3869078       | NM_033329                   | SIGLEC12         | 0.000104287 | -2.14636                 | Control down vs N-RAS | GO:0007155                          | cell adhesion                                          |
| 2429261       | NM_002524                   | NRAS             | 2.20E-07    | -2.14477                 | Control down vs N-RAS | GO:0000165                          | MAPK cascade                                           |
| 3338192       | NM_053056                   | CCND1            | 4.58E-06    | -2.13858                 | Control down vs N-RAS | GO:0000080                          | G1 phase of mitotic cell cycle                         |
| 2735759       | ENST00000394980             | MMRN1            | 3.70E-07    | -2.12766                 | Control down vs N-RAS | GO:0002576                          | platelet degranulation                                 |
| 3299578       | NM_003956                   | CH25H            | 0.000115365 | -2.11985                 | Control down vs N-RAS | GO:0006629                          | lipid metabolic process                                |
| 3345427       | NM_015036                   | ENDOD1           | 2.17E-06    | -2.09722                 | Control down vs N-RAS |                                     |                                                        |
| 3622386       | NM_001482                   | GATM             | 0.000541147 | -2.09219                 | Control down vs N-RAS | GO:0006600                          | creatine metabolic process                             |
| 3908358       | ENST00000359930             | SULF2            | 1.13E-05    | -2.08273                 | Control down vs N-RAS | GO:0001822                          | kidney development                                     |
| 3887210       | NM_004994                   | MMP9             | 5.80E-05    | -2.08262                 | Control down vs N-RAS | GO:0001501                          | skeletal system development                            |
| 3758510       | NM_001986                   | ETV4             | 2.62E-06    | -2.08204                 | Control down vs N-RAS | GO:0006351                          | transcription, DNA-dependent                           |
| 3417842       | NM_002332                   | LRP1             | 6.51E-05    | -2.07352                 | Control down vs N-RAS | GO:0006898                          | receptor-mediated endocytosis                          |
| 3076868       | NM_013252                   | CLEC5A           | 4.28E-05    | -2.06825                 | Control down vs N-RAS | GO:0002076                          | osteoblast development                                 |
| 3420316       | ENST00000403681             | HMGA2            | 0.000145477 | -2.06393                 | Control down vs N-RAS | GO:0000122                          | negative regulation of transcription from RNA polymera |
| 2878437       | ENST00000302014             | CD14             | 0.000387932 | -2.06241                 | Control down vs N-RAS | GO:0006909                          | phagocytosis                                           |
| 3812385       | ENST00000280200             | CD226            | 0.000162212 | -2.05972                 | Control down vs N-RAS | GO:0001816                          | cytokine production                                    |
| 3580769       | ENST00000348956             | CKB              | 2.20E-05    | -2.05575                 | Control down vs N-RAS | GO:0006600                          | creatine metabolic process                             |
| 3589141       | NM_152594                   | SPRED1           | 0.00051876  | -2.04069                 | Control down vs N-RAS | GO:0000188                          | inactivation of MAPK activity                          |
| 3414296       | NM_000486                   | AQP2             | 4.22E-05    | -2.03535                 | Control down vs N-RAS | GO:0003097                          | renal water transport                                  |

| Transcript ID | Gene Assignment (RefSeq ID) | Common Gene Name | p-value     | Regulation (Fold-Change) | Regulation            | Gene Ontology (GO) Accession number | GO Biological Process                         |
|---------------|-----------------------------|------------------|-------------|--------------------------|-----------------------|-------------------------------------|-----------------------------------------------|
| 3750767       | ENST00000395321             | ALDOC            | 0.000106937 | -2.03355                 | Control down vs N-RAS | GO:0001666                          | response to hypoxia                           |
| 3577612       | NM_001002236                | SERPINA1         | 8.21E-07    | -2.02758                 | Control down vs N-RAS | GO:0001666                          | response to hypoxia                           |
| 3707335       | NM_000173                   | GP1BA            | 3.09E-05    | -2.01335                 | Control down vs N-RAS | GO:0007155                          | cell adhesion                                 |
| 3734379       | NM_007261                   | CD300A           | 0.000116902 | -2.00012                 | Control down vs N-RAS | GO:0007155                          | cell adhesion                                 |
| 3901041       | ENST00000377103             | THBD             | 0.000496945 | -1.98116                 | Control down vs N-RAS | GO:0007565                          | female pregnancy                              |
| 3753860       | NM_002985                   | CCL5             | 3.78E-07    | -1.96683                 | Control down vs N-RAS | GO:0000165                          | MAPK cascade                                  |
| 3388859       | ENST00000532855             | MMP12            | 0.000191212 | -1.96301                 | Control down vs N-RAS |                                     |                                               |
| 3462816       | ENST00000266671             | PHLDA1           | 0.000406482 | -1.95507                 | Control down vs N-RAS | GO:0006915                          | apoptotic process                             |
| 3976639       | NM_022825                   | PORCN            | 2.21E-06    | -1.95168                 | Control down vs N-RAS | GO:0016055                          | Wnt receptor signaling pathway                |
| 3726691       | ENST00000285238             | ABCC3            | 2.32E-05    | -1.90653                 | Control down vs N-RAS | GO:0006810                          | transport                                     |
| 3870611       | NM_024318                   | LILRA6           | 0.000547687 | -1.86805                 | Control down vs N-RAS |                                     |                                               |
| 3039177       | NM_004956                   | ETV1             | 5.03E-06    | -1.86698                 | Control down vs N-RAS | GO:0006355                          | regulation of transcription, DNA-dependent    |
| 2640579       | NM_032242                   | PLXNA1           | 0.000111699 | -1.85328                 | Control down vs N-RAS | GO:0007275                          | multicellular organismal development          |
| 2438575       | ENST00000368199             | SH2D2A           | 0.0001266   | -1.85129                 | Control down vs N-RAS | GO:0001525                          | angiogenesis                                  |
| 2434139       | NM_014849                   | SV2A             | 3.78E-05    | -1.85083                 | Control down vs N-RAS | GO:0006836                          | neurotransmitter transport                    |
| 3293280       | NM_021129                   | PPA1             | 0.000227472 | -1.84078                 | Control down vs N-RAS | GO:0006418                          | tRNA aminoacylation for protein translation   |
| 3151970       | NM_014751                   | MTSS1            | 2.43E-06    | -1.82939                 | Control down vs N-RAS | GO:0006928                          | cellular component movement                   |
| 3529113       | NM_138460                   | CMTM5            | 1.68E-05    | -1.82812                 | Control down vs N-RAS | GO:0006935                          | chemotaxis                                    |
| 3681705       | NR_003369                   | RRN3P2           | 5.12E-05    | -1.82369                 | Control down vs N-RAS | GO:0001701                          | in utero embryonic development                |
| 3742627       | ENST00000574081             | SCIMP            | 3.13E-05    | -1.81916                 | Control down vs N-RAS | GO:0070374                          | positive regulation of ERK1 and ERK2 cascade  |
| 3656990       | NM_001145808                | ITGAM            | 8.07E-07    | -1.80306                 | Control down vs N-RAS | GO:0007155                          | cell adhesion                                 |
| 3557350       | ENST00000397267             | SLC22A17         | 0.000130184 | -1.80097                 | Control down vs N-RAS | GO:0015891                          | siderophore transport                         |
| 3569257       | ENST00000216446             | PLEK2            | 0.000419819 | -1.79316                 | Control down vs N-RAS | GO:0030036                          | actin cytoskeleton organization               |
| 3215570       | NM_000507                   | FBP1             | 7.66E-09    | -1.79184                 | Control down vs N-RAS | GO:0005975                          | carbohydrate metabolic process                |
| 2599153       | NM_022648                   | TNS1             | 3.72E-06    | -1.78298                 | Control down vs N-RAS | GO:0007044                          | cell-substrate junction assembly              |
| 3046444       | NM_003014                   | SFRP4            | 0.000257818 | -1.78139                 | Control down vs N-RAS | GO:0001944                          | vasculature development                       |
| 3960388       | NM_003560                   | PLA2G6           | 0.000102186 | -1.78108                 | Control down vs N-RAS | GO:0008219                          | cell death                                    |
| 3362159       | NM_020645                   | NRIP3            | 0.000551347 | -1.75779                 | Control down vs N-RAS | GO:0006508                          | proteolysis                                   |
| 2601414       | ENST00000409840             | SERPINE2         | 3.10E-05    | -1.75699                 | Control down vs N-RAS | GO:0010757                          | negative regulation of plasminogen activation |

| Transcript ID | Gene Assignment (RefSeq ID) | Common Gene Name | p-value     | Regulation (Fold-Change) | Regulation            | Gene Ontology (GO) Accession number | GO Biological Process                               |
|---------------|-----------------------------|------------------|-------------|--------------------------|-----------------------|-------------------------------------|-----------------------------------------------------|
| 3198346       | NM_002839                   | PTPRD            | 0.000196156 | -1.75448                 | Control down vs N-RAS | GO:0006470                          | protein dephosphorylation                           |
| 3528864       | ENST00000311852             | MMP14            | 7.84E-05    | -1.75208                 | Control down vs N-RAS | GO:0001503                          | ossification                                        |
| 3976341       | NM_003254                   | TIMP1            | 1.59E-05    | -1.74651                 | Control down vs N-RAS | GO:0001775                          | cell activation                                     |
| 3841357       | NM_001130917                | LILRA2           | 0.000298938 | -1.74101                 | Control down vs N-RAS | GO:0006952                          | defense response                                    |
| 2945741       | NM_014722                   | FAM65B           | 0.000170104 | -1.73989                 | Control down vs N-RAS | GO:0007517                          | muscle organ development                            |
| 3995254       | ENST00000370306             | GABRQ            | 6.19E-05    | -1.72911                 | Control down vs N-RAS | GO:0006836                          | neurotransmitter transport                          |
| 3839619       | NM_014441                   | SIGLEC9          | 6.76E-05    | -1.72874                 | Control down vs N-RAS | GO:0007155                          | cell adhesion                                       |
| 3892812       | NM_016354                   | SLCO4A1          | 1.23E-05    | -1.72266                 | Control down vs N-RAS | GO:0042403                          | thyroid hormone metabolic process                   |
| 3281621       | NM_020824                   | ARHGAP21         | 2.47E-05    | -1.72214                 | Control down vs N-RAS | GO:0007030                          | Golgi organization                                  |
| 3980078       | NM_001142503                | STARD8           | 5.68E-07    | -1.70835                 | Control down vs N-RAS | GO:0007264                          | small GTPase mediated signal transduction           |
| 3592401       | NM_032413                   | C15orf48         | 0.000654438 | -1.70231                 | Control down vs N-RAS |                                     |                                                     |
| 3657041       | NM_005353                   | ITGAD            | 1.49E-05    | -1.7008                  | Control down vs N-RAS | GO:0006955                          | immune response                                     |
| 3635159       | NR_028330                   | C15orf37         | 0.000134574 | -1.69221                 | Control down vs N-RAS | GO:0009396                          | folic acid-containing compound biosynthetic process |
| 3545130       | NM_014909                   | VASH1            | 0.000673784 | -1.68552                 | Control down vs N-RAS | GO:0001525                          | angiogenesis                                        |
| 3873160       | NM_021158                   | TRIB3            | 1.54E-05    | -1.66882                 | Control down vs N-RAS | GO:0006351                          | transcription, DNA-dependent                        |
| 2902593       | NM_001003693                | LY6G6F           | 1.36E-05    | -1.66224                 | Control down vs N-RAS |                                     |                                                     |
| 3936515       | NM_018943                   | TUBA8            | 8.17E-05    | -1.65753                 | Control down vs N-RAS | GO:0007018                          | microtubule-based movement                          |
| 3156307       | NM_153831                   | PTK2             | 4.96E-06    | -1.64554                 | Control down vs N-RAS | GO:0000226                          | microtubule cytoskeleton organization               |
| 3454821       | NM_001033873                | SMAGP            | 4.94E-05    | -1.63504                 | Control down vs N-RAS |                                     |                                                     |
| 3841862       | NM_002000                   | FCAR             | 0.000643916 | -1.6314                  | Control down vs N-RAS | GO:0006955                          | immune response                                     |
| 3340449       | NM_007256                   | SLCO2B1          | 8.97E-05    | -1.62824                 | Control down vs N-RAS | GO:0015711                          | organic anion transport                             |
| 2374126       | ENST00000367362             | NR5A2            | 5.25E-05    | -1.62488                 | Control down vs N-RAS | GO:0006355                          | regulation of transcription, DNA-dependent          |
| 3232349       | NM_001242339                | PFKP             | 2.86E-08    | -1.62484                 | Control down vs N-RAS | GO:0005975                          | carbohydrate metabolic process                      |
| 2600068       | ENST00000248437             | TUBA4A           | 1.47E-05    | -1.62094                 | Control down vs N-RAS | GO:0000086                          | G2/M transition of mitotic cell cycle               |
| 3662808       | NM_001145772                | GPR56            | 5.11E-05    | -1.61411                 | Control down vs N-RAS | GO:0007155                          | cell adhesion                                       |
| 3621080       | NM_201631                   | TGM5             | 9.76E-05    | -1.6038                  | Control down vs N-RAS | GO:0006464                          | cellular protein modification process               |
| 2908261       | ENST00000336600             | C6orf223         | 0.00012106  | -1.60226                 | Control down vs N-RAS |                                     |                                                     |
| 3890597       | ENST00000356208             | RBM38            | 1.80E-06    | -1.60185                 | Control down vs N-RAS | GO:0006397                          | mRNA processing                                     |
| 3396107       | ENST00000464067             | ESAM             | 7.10E-06    | -1.60092                 | Control down vs N-RAS | GO:0007156                          | homophilic cell adhesion                            |

| Transcript ID | Gene Assignment (RefSeq ID) | Common Gene Name | p-value     | Regulation (Fold-Change) | Regulation            | Gene Ontology (GO) Accession number | GO Biological Process                                    |
|---------------|-----------------------------|------------------|-------------|--------------------------|-----------------------|-------------------------------------|----------------------------------------------------------|
| 3635198       | NM_001114735                | BCL2A1           | 6.52E-05    | -1.59391                 | Control down vs N-RAS | GO:0006915                          | apoptotic process                                        |
| 3979762       | ENST00000519389             | HEPH             | 1.53E-05    | -1.58778                 | Control down vs N-RAS | GO:0006825                          | copper ion transport                                     |
| 3405748       | NM_001423                   | EMP1             | 0.000269863 | -1.58563                 | Control down vs N-RAS | GO:0007275                          | multicellular organismal development                     |
| 2361154       | NM_152280                   | SYT11            | 0.000474229 | -1.58457                 | Control down vs N-RAS |                                     |                                                          |
| 3218528       | NM_005502                   | ABCA1            | 0.000568883 | -1.58318                 | Control down vs N-RAS | GO:0002790                          | peptide secretion                                        |
| 3456732       | ENST00000293379             | ITGA5            | 9.59E-06    | -1.58306                 | Control down vs N-RAS | GO:0001525                          | angiogenesis                                             |
| 2883440       | NM_033274                   | ADAM19           | 2.53E-05    | -1.57999                 | Control down vs N-RAS | GO:0006508                          | proteolysis                                              |
| 3434726       | NR_033948                   | P2RX7            | 0.000504884 | -1.57793                 | Control down vs N-RAS | GO:0002028                          | regulation of sodium ion transport                       |
| 3662851       | NM_170776                   | GPR97            | 0.000146461 | -1.5776                  | Control down vs N-RAS | GO:0007218                          | neuropeptide signaling pathway                           |
| 2427981       | NM_020683                   | ADORA3           | 8.95E-05    | -1.57111                 | Control down vs N-RAS | GO:0006954                          | inflammatory response                                    |
| 3188111       | NM_000962                   | PTGS1            | 1.69E-06    | -1.5701                  | Control down vs N-RAS | GO:0001516                          | prostaglandin biosynthetic process                       |
| 3945651       | NM_021822                   | APOBEC3G         | 0.000331342 | -1.5685                  | Control down vs N-RAS | GO:0002230                          | positive regulation of defense response to virus by host |
| 2320727       | NM_001066                   | TNFRSF1B         | 1.64E-05    | -1.56845                 | Control down vs N-RAS | GO:0006915                          | apoptotic process                                        |
| 3601955       | ENST00000352410             | MPI              | 7.70E-05    | -1.56499                 | Control down vs N-RAS | GO:0005975                          | carbohydrate metabolic process                           |
| 2489228       | ENST00000348227             | WDR54            | 1.14E-05    | -1.56174                 | Control down vs N-RAS | GO:0006915                          | apoptotic process                                        |
| 3995804       | NM_005629                   | SLC6A8           | 0.000204251 | -1.55784                 | Control down vs N-RAS | GO:0006600                          | creatine metabolic process                               |
| 3148463       | NM_001146                   | ANGPT1           | 0.000414903 | -1.55715                 | Control down vs N-RAS | GO:0001936                          | regulation of endothelial cell proliferation             |
| 3281703       | NM_020200                   | PRTFDC1          | 6.87E-05    | -1.55513                 | Control down vs N-RAS | GO:0006166                          | purine ribonucleoside salvage                            |
| 7385611       | NM_001258359                | HPCAL1           | 5.62E-06    | -1.55384                 | Control down vs N-RAS |                                     |                                                          |
| 2775994       | NM_006665                   | HPSE             | 0.000132173 | -1.55195                 | Control down vs N-RAS | GO:0005975                          | carbohydrate metabolic process                           |
| 2363808       | NM_001002273                | FCGR2B           | 2.29E-05    | -1.54871                 | Control down vs N-RAS | GO:0006955                          | immune response                                          |
| 2933392       | ---                         | ---              | 2.00E-06    | -1.54777                 | Control down vs N-RAS |                                     |                                                          |
| 3387537       | ENST00000524717             | MAML2            | 0.000448761 | -1.54278                 | Control down vs N-RAS | GO:0006367                          | transcription initiation from RNA polymerase II promot   |
| 3204721       | ENST00000378292             | TPM2             | 1.59E-05    | -1.542                   | Control down vs N-RAS | GO:0006936                          | muscle contraction                                       |
| 3191352       | NM_014286                   | NCS1             | 1.94E-05    | -1.53423                 | Control down vs N-RAS | GO:0010975                          | regulation of neuron projection development              |
| 3759137       | NM_000419                   | ITGA2B           | 0.0001616   | -1.53277                 | Control down vs N-RAS | GO:0002576                          | platelet degranulation                                   |
| 2772876       | NM_014243                   | ADAMTS3          | 0.000315677 | -1.5199                  | Control down vs N-RAS | GO:0006508                          | proteolysis                                              |
| 3726325       | NM_022167                   | XYLT2            | 1.18E-05    | -1.51257                 | Control down vs N-RAS | GO:0006024                          | glycosaminoglycan biosynthetic process                   |
| 3883921       | NM_006097                   | MYL9             | 0.000490309 | -1.50525                 | Control down vs N-RAS | GO:0006936                          | muscle contraction                                       |

| Transcript ID | Gene Assignment (RefSeq ID) | Common Gene Name | p-value     | Regulation (Fold-Change) | Regulation            | Gene Ontology (GO) Accession number | GO Biological Process                                       |
|---------------|-----------------------------|------------------|-------------|--------------------------|-----------------------|-------------------------------------|-------------------------------------------------------------|
| 3761164       | NM_003726                   | SKAP1            | 5.25E-05    | -1.50203                 | Control down vs N-RAS | GO:0045893                          | positive regulation of transcription, DNA-dependent         |
| 3225952       | NM_022833                   | FAM129B          | 0.000377538 | -1.49915                 | Control down vs N-RAS | GO:0043066                          | negative regulation of apoptotic process                    |
| 3354443       | NM_198277                   | SLC37A2          | 3.18E-06    | -1.49772                 | Control down vs N-RAS | GO:0008643                          | carbohydrate transport                                      |
| 3902489       | ENST00000376062             | BCL2L1           | 0.000534995 | -1.49323                 | Control down vs N-RAS | GO:0000910                          | cytokinesis                                                 |
| 3721956       | NM_016437                   | TUBG2            | 0.000540103 | -1.4907                  | Control down vs N-RAS | GO:0000086                          | G2/M transition of mitotic cell cycle                       |
| 3832992       | NM_022835                   | PLEKHG2          | 2.93E-05    | -1.48028                 | Control down vs N-RAS | GO:0006915                          | apoptotic process                                           |
| 3595846       | NM_001040450                | FAM63B           | 0.000368787 | -1.4785                  | Control down vs N-RAS | GO:0008150                          | biological_process                                          |
| 3870361       | NM_144687                   | NLRP12           | 6.20E-05    | -1.47563                 | Control down vs N-RAS | GO:0006919                          | activation of cysteine-type endopeptidase activity involved |
| 3743340       | NM_080912                   | ASGR2            | 0.000479963 | -1.47554                 | Control down vs N-RAS | GO:0007166                          | cell surface receptor signaling pathway                     |
| 3599758       | NM_001104554                | PAQR5            | 2.07E-05    | -1.47537                 | Control down vs N-RAS | GO:0007275                          | multicellular organismal development                        |
| 2358360       | NM_001202858                | ECM1             | 0.000163204 | -1.47532                 | Control down vs N-RAS | GO:0001503                          | ossification                                                |
| 3757917       | NM_012232                   | PTRF             | 3.41E-05    | -1.46971                 | Control down vs N-RAS | GO:0006355                          | regulation of transcription, DNA-dependent                  |
| 3891342       | NM_030773                   | TUBB1            | 0.000256593 | -1.46806                 | Control down vs N-RAS | GO:0006457                          | protein folding                                             |
| 3179646       | ENST00000375472             | SUSD3            | 0.000129138 | -1.46702                 | Control down vs N-RAS |                                     |                                                             |
| 3649714       | ENST00000300006             | C16orf45         | 3.75E-05    | -1.46645                 | Control down vs N-RAS |                                     |                                                             |
| 3429857       | NM_001145199                | C12orf75         | 3.74E-05    | -1.46579                 | Control down vs N-RAS |                                     |                                                             |
| 3456049       | ENST00000267082             | ITGB7            | 8.77E-05    | -1.45438                 | Control down vs N-RAS | GO:0007155                          | cell adhesion                                               |
| 3326635       | NM_000610                   | CD44             | 6.41E-05    | -1.45318                 | Control down vs N-RAS | GO:0007155                          | cell adhesion                                               |
| 2619480       | NM_001296                   | CCBP2            | 4.93E-05    | -1.45245                 | Control down vs N-RAS | GO:0006935                          | chemotaxis                                                  |
| 3664785       | NM_016951                   | CKLF             | 2.79E-05    | -1.45052                 | Control down vs N-RAS | GO:0008283                          | cell proliferation                                          |
| 3967689       | ENST00000217961             | STS              | 0.000114689 | -1.43717                 | Control down vs N-RAS | GO:0006665                          | sphingolipid metabolic process                              |
| 3864551       | NM_002659                   | PLAUR            | 0.000168976 | -1.42612                 | Control down vs N-RAS | GO:0006501                          | C-terminal protein lipidation                               |
| 3991889       | NM_001078171                | FAM127A          | 0.000393656 | -1.42069                 | Control down vs N-RAS |                                     |                                                             |
| 3755323       | NM_007144                   | PCGF2            | 7.74E-05    | -1.4202                  | Control down vs N-RAS | GO:0000122                          | negative regulation of transcription from RNA polymerase II |
| 3670772       | NM_198390                   | CMIP             | 2.05E-05    | -1.41473                 | Control down vs N-RAS |                                     |                                                             |
| 3731826       | NM_002737                   | PRKCA            | 0.000310773 | -1.40324                 | Control down vs N-RAS | GO:0001525                          | angiogenesis                                                |
| 3944690       | ENST00000248901             | CYTH4            | 3.55E-05    | -1.40282                 | Control down vs N-RAS | GO:0016192                          | vesicle-mediated transport                                  |
| 3951719       | NM_031890                   | CECR6            | 0.000400735 | -1.40094                 | Control down vs N-RAS |                                     |                                                             |

| Transcript ID | Gene Assignment (RefSeq ID) | Common Gene Name | p-value     | Regulation (Fold-Change) | Regulation            | Gene Ontology (GO) Accession number | GO Biological Process                                     |
|---------------|-----------------------------|------------------|-------------|--------------------------|-----------------------|-------------------------------------|-----------------------------------------------------------|
| 3137530       | NM_004318                   | ASPH             | 0.000340173 | -1.40078                 | Control down vs N-RAS | GO:0006936                          | muscle contraction                                        |
| 3867965       | NM_006270                   | RRAS             | 0.000217213 | -1.39841                 | Control down vs N-RAS | GO:0006184                          | GTP catabolic process                                     |
| 3284302       | NM_003873                   | NRP1             | 3.83E-05    | -1.39561                 | Control down vs N-RAS | GO:0001569                          | patterning of blood vessels                               |
| 3447694       | NM_001178094                | BCAT1            | 0.000211362 | -1.39053                 | Control down vs N-RAS | GO:0000082                          | G1/S transition of mitotic cell cycle                     |
| 3687494       | NM_001040056                | MAPK3            | 6.03E-05    | -1.38628                 | Control down vs N-RAS | GO:0000165                          | MAPK cascade                                              |
| 3261820       | NM_030912                   | TRIM8            | 0.000420297 | -1.38096                 | Control down vs N-RAS | GO:0008150                          | no biological data available                              |
| 3863021       | NM_000660                   | TGFB1            | 5.64E-05    | -1.37873                 | Control down vs N-RAS | GO:0000060                          | protein import into nucleus, translocation                |
| 3570373       | NM_033262                   | SLC8A3           | 0.000453561 | -1.37688                 | Control down vs N-RAS | GO:0006811                          | ion transport                                             |
| 3864646       | NM_002250                   | KCNN4            | 0.000147527 | -1.37561                 | Control down vs N-RAS | GO:0006813                          | potassium ion transport                                   |
| 3656829       | NM_001122957                | BCKDK            | 0.000291767 | -1.3726                  | Control down vs N-RAS | GO:0009063                          | cellular amino acid catabolic process                     |
| 3730322       | NM_006039                   | MRC2             | 3.53E-06    | -1.37164                 | Control down vs N-RAS | GO:0006897                          | endocytosis                                               |
| 3371003       | NM_001258320                | TP53I11          | 7.60E-05    | -1.36998                 | Control down vs N-RAS | GO:0006950                          | response to stress                                        |
| 3850020       | NM_031917                   | ANGPTL6          | 6.71E-05    | -1.36179                 | Control down vs N-RAS | GO:0001525                          | angiogenesis                                              |
| 3888613       | NM_005194                   | CEBPB            | 0.000266227 | -1.36103                 | Control down vs N-RAS | GO:0001892                          | embryonic placenta development                            |
| 2777714       | NM_000345                   | SNCA             | 0.000139137 | -1.35894                 | Control down vs N-RAS | GO:0001774                          | microglial cell activation                                |
| 3768474       | NM_017983                   | WIPI1            | 0.00050453  | -1.35268                 | Control down vs N-RAS | GO:0000045                          | autophagic vacuole assembly                               |
| 3869237       | NM_001193306                | FPR1             | 0.000330656 | -1.35194                 | Control down vs N-RAS | GO:0000187                          | activation of MAPK activity                               |
| 3846238       | NM_174983                   | MFSD12           | 0.000257989 | -1.35068                 | Control down vs N-RAS | GO:0006810                          | transport                                                 |
| 2497161       | NM_003853                   | IL18RAP          | 0.00064436  | -1.3466                  | Control down vs N-RAS | GO:0006954                          | inflammatory response                                     |
| 3592511       | ENST00000260324             | SQRDL            | 0.000342847 | -1.34335                 | Control down vs N-RAS | GO:0000096                          | sulfur amino acid metabolic process                       |
| 3772090       | ENST00000392467             | TMC6             | 0.0004188   | -1.33951                 | Control down vs N-RAS | GO:0006417                          | regulation of translation                                 |
| 3693314       | NM_005550                   | KIFC3            | 3.23E-06    | -1.33749                 | Control down vs N-RAS | GO:0007018                          | microtubule-based movement                                |
| 3226041       | NM_170600                   | SH2D3C           | 9.07E-05    | -1.33744                 | Control down vs N-RAS | GO:0007254                          | JNK cascade                                               |
| 2888800       | NM_004395                   | DBN1             | 0.00031225  | -1.33668                 | Control down vs N-RAS | GO:0007015                          | actin filament organization                               |
| 3381150       | NM_001243784                | PDE2A            | 4.86E-05    | -1.33521                 | Control down vs N-RAS | GO:0000122                          | negative regulation of transcription from RNA polymerase  |
| 2452069       | NM_002646                   | PIK3C2B          | 0.000351902 | -1.33101                 | Control down vs N-RAS | GO:0008150                          | no biological data available                              |
| 3120008       | NM_019037                   | EXOSC4           | 0.000419394 | -1.32989                 | Control down vs N-RAS | GO:0000288                          | nuclear-transcribed mRNA catabolic process, deadenylation |
| 3770305       | NM_006678                   | CD300C           | 0.000302612 | -1.32821                 | Control down vs N-RAS | GO:0006968                          | cellular defense response                                 |
| 3526831       | NM_007368                   | RASA3            | 6.29E-05    | -1.32536                 | Control down vs N-RAS | GO:0007165                          | signal transduction                                       |

| Transcript ID | Gene Assignment (RefSeq ID) | Common Gene Name | p-value     | Regulation (Fold-Change) | Regulation            | Gene Ontology (GO) Accession number | GO Biological Process                                        |
|---------------|-----------------------------|------------------|-------------|--------------------------|-----------------------|-------------------------------------|--------------------------------------------------------------|
| 3027204       | ENST00000263552             | TBXAS1           | 3.43E-05    | -1.32472                 | Control down vs N-RAS | GO:0001516                          | prostaglandin biosynthetic process                           |
| 3852880       | NM_013447                   | EMR2             | 0.000444094 | -1.32461                 | Control down vs N-RAS | GO:0006954                          | inflammatory response                                        |
| 3315024       | NM_001109                   | ADAM8            | 4.94E-06    | -1.32423                 | Control down vs N-RAS | GO:0000902                          | cell morphogenesis                                           |
| 3529725       | ENST00000559919             | REC8             | 1.96E-06    | -1.31938                 | Control down vs N-RAS | GO:0001556                          | oocyte maturation                                            |
| 4000704       | NM_003916                   | AP1S2            | 0.000377395 | -1.31615                 | Control down vs N-RAS | GO:0006886                          | intracellular protein transport                              |
| 3752709       | ENST00000318217             | MYO1D            | 0.000295803 | -1.31504                 | Control down vs N-RAS | GO:0010923                          | negative regulation of phosphatase activity                  |
| 3893910       | NM_198723                   | TCEA2            | 6.89E-05    | -1.31474                 | Control down vs N-RAS | GO:0006351                          | transcription, DNA-dependent                                 |
| 3654175       | NM_000418                   | IL4R             | 0.00026485  | -1.31321                 | Control down vs N-RAS | GO:0002532                          | production of molecular mediator involved in inflammatory re |
| 3527514       | NM_000270                   | PNP              | 0.000218987 | -1.30803                 | Control down vs N-RAS | GO:0006139                          | nucleobase-containing compound metabolic process             |
| 3454006       | NM_175736                   | FMNL3            | 0.000212358 | -1.3072                  | Control down vs N-RAS | GO:0007010                          | cytoskeleton organization                                    |
| 2351854       | ENST00000343534             | C1orf162         | 1.04E-05    | -1.29983                 | Control down vs N-RAS |                                     |                                                              |
| 3836317       | NM_003370                   | VASP             | 0.0004485   | -1.29468                 | Control down vs N-RAS | GO:0001843                          | neural tube closure                                          |
| 2881239       | ENST00000261799             | PDGFRB           | 4.29E-05    | -1.29352                 | Control down vs N-RAS | GO:0001701                          | in utero embryonic development                               |
| 3305313       | ENST00000278071             | ITPRIP           | 0.000567556 | -1.28765                 | Control down vs N-RAS |                                     |                                                              |
| 4008170       | NM_139289                   | AKAP4            | 0.000613622 | -1.28587                 | Control down vs N-RAS | GO:0006928                          | cellular component movement                                  |
| 3832256       | NM_021102                   | SPINT2           | 9.64E-05    | -1.28373                 | Control down vs N-RAS | GO:0006928                          | cellular component movement                                  |
| 3020302       | NM_001172895                | CAV1             | 2.34E-05    | -1.28182                 | Control down vs N-RAS | GO:0000122                          | negative regulation of transcription from RNA polymerase     |
| 2507896       | NM_006895                   | HNMT             | 0.000239615 | -1.27482                 | Control down vs N-RAS | GO:0002347                          | response to tumor cell                                       |
| 3060182       | NM_000927                   | ABCB1            | 0.000494418 | -1.27466                 | Control down vs N-RAS | GO:0000086                          | G2/M transition of mitotic cell cycle                        |
| 3707095       | NM_004313                   | ARRB2            | 0.000154339 | -1.27142                 | Control down vs N-RAS | GO:0001932                          | regulation of protein phosphorylation                        |
| 2616131       | ENST00000330953             | CCR4             | 0.00032708  | -1.27003                 | Control down vs N-RAS | GO:0001764                          | neuron migration                                             |
| 2639734       | NM_001024660                | KALRN            | 0.000107846 | -1.26932                 | Control down vs N-RAS | GO:0006468                          | protein phosphorylation                                      |
| 3317071       | NM_001242932                | LSP1             | 4.85E-08    | -1.26699                 | Control down vs N-RAS | GO:0006928                          | cellular component movement                                  |
| 3829687       | NM_000175                   | GPI              | 0.000224407 | -1.26405                 | Control down vs N-RAS | GO:0001525                          | angiogenesis                                                 |
| 3708462       | NM_014716                   | ACAP1            | 1.51E-05    | -1.26132                 | Control down vs N-RAS | GO:0006629                          | lipid metabolic process                                      |
| 2888648       | NM_001031677                | RAB24            | 0.000670137 | -1.26029                 | Control down vs N-RAS | GO:0006914                          | autophagy                                                    |
| 3820612       | NM_001145056                | SLC44A2          | 9.21E-06    | -1.2538                  | Control down vs N-RAS | GO:0007165                          | signal transduction                                          |
| 3377669       | NM_001130144                | LTBP3            | 0.000466113 | -1.24979                 | Control down vs N-RAS | GO:0007179                          | transforming growth factor beta receptor signaling pathwa    |

| Transcript ID | Gene Assignment (RefSeq ID) | Common Gene Name | p-value     | Regulation (Fold-Change) | Regulation            | Gene Ontology (GO) Accession number | GO Biological Process                                     |
|---------------|-----------------------------|------------------|-------------|--------------------------|-----------------------|-------------------------------------|-----------------------------------------------------------|
| 3529508       | ENST00000216780             | PCK2             | 0.000148406 | -1.24896                 | Control down vs N-RAS | GO:0005975                          | carbohydrate metabolic process                            |
| 3752611       | NM_022344                   | C17orf75         | 0.000293738 | -1.2422                  | Control down vs N-RAS | GO:0007283                          | spermatogenesis                                           |
| 3607447       | NM_007011                   | ABHD2            | 8.28E-05    | -1.24146                 | Control down vs N-RAS | GO:0008150                          | no biological data available                              |
| 2662331       | NM_003656                   | CAMK1            | 8.71E-05    | -1.24098                 | Control down vs N-RAS | GO:0006468                          | protein phosphorylation                                   |
| 3771602       | NM_024599                   | RHBDF2           | 0.000173113 | -1.24095                 | Control down vs N-RAS | GO:0006508                          | proteolysis                                               |
| 3960478       | ENST00000400206             | CSNK1E           | 0.000629253 | -1.2408                  | Control down vs N-RAS | GO:0000086                          | G2/M transition of mitotic cell cycle                     |
| 3540552       | NM_178155                   | FUT8             | 0.000215516 | -1.23423                 | Control down vs N-RAS | GO:0001701                          | in utero embryonic development                            |
| 3410614       | NM_139241                   | FGD4             | 0.000290373 | -1.23327                 | Control down vs N-RAS | GO:0006915                          | apoptotic process                                         |
| 3816264       | NM_032482                   | DOT1L            | 0.000250583 | -1.23298                 | Control down vs N-RAS | GO:0034968                          | histone lysine methylation                                |
| 2887048       | NM_005990                   | STK10            | 4.40E-05    | -1.22859                 | Control down vs N-RAS | GO:0006468                          | protein phosphorylation                                   |
| 2878809       | NM_022481                   | ARAP3            | 0.000279899 | -1.22746                 | Control down vs N-RAS | GO:0007010                          | cytoskeleton organization                                 |
| 2880361       | NR_038902                   | JAKMIP2-AS1      | 0.000265617 | -1.22137                 | Control down vs N-RAS |                                     |                                                           |
| 2403215       | NM_001042747                | FGR              | 0.000291596 | -1.22018                 | Control down vs N-RAS | GO:0002768                          | immune response-regulating cell surface receptor signalin |
| 3151883       | NM_194291                   | TMEM65           | 4.62E-06    | -1.21775                 | Control down vs N-RAS |                                     |                                                           |
| 3702547       | ENST00000262428             | COTL1            | 0.000217481 | -1.21508                 | Control down vs N-RAS | GO:0008150                          | no biological data available                              |
| 3255402       | NM_018999                   | FAM190B          | 0.000412797 | -1.21219                 | Control down vs N-RAS |                                     |                                                           |
| 3598758       | NR_027654                   | SMAD6            | 2.31E-05    | -1.21099                 | Control down vs N-RAS | GO:0001657                          | ureteric bud development                                  |
| 3574121       | NM_033104                   | STON2            | 0.000399932 | -1.20629                 | Control down vs N-RAS | GO:0006886                          | intracellular protein transport                           |
| 2405469       | NM_198040                   | PHC2             | 5.40E-05    | -1.20446                 | Control down vs N-RAS | GO:0007275                          | multicellular organismal development                      |
| 3951732       | NM_033070                   | CECR5            | 0.000660319 | -1.2026                  | Control down vs N-RAS |                                     |                                                           |
| 3403244       | NM_014718                   | CLSTN3           | 0.000552207 | -1.1965                  | Control down vs N-RAS | GO:0007156                          | homophilic cell adhesion                                  |
| 3996404       | NM_001493                   | GDI1             | 0.000330545 | -1.19636                 | Control down vs N-RAS | GO:0007165                          | signal transduction                                       |
| 3130113       | ENST00000355904             | GTF2E2           | 0.000101175 | -1.19434                 | Control down vs N-RAS | GO:0006355                          | regulation of transcription, DNA-dependent                |
| 3822657       | NM_078481                   | CD97             | 0.000129345 | -1.19389                 | Control down vs N-RAS | GO:0006928                          | cellular component movement                               |
| 3157901       | NM_201384                   | PLEC             | 2.18E-05    | -1.19347                 | Control down vs N-RAS | GO:0006915                          | apoptotic process                                         |
| 3743551       | ENST00000356683             | C17orf81         | 0.000432644 | -1.19263                 | Control down vs N-RAS | GO:0006351                          | transcription, DNA-dependent                              |
| 3204744       | ENST00000314888             | TLN1             | 8.67E-05    | -1.19199                 | Control down vs N-RAS | GO:0002576                          | platelet degranulation                                    |
| 3631964       | NM_001206796                | PKM              | 0.000307982 | -1.18478                 | Control down vs N-RAS | GO:0005975                          | carbohydrate metabolic process                            |
| 3818897       | NM_001166111                | PNPLA6           | 0.000226017 | -1.18005                 | Control down vs N-RAS | GO:0001525                          | angiogenesis                                              |



| Transcript ID | Gene Assignment (RefSeq ID) | Common Gene Name | p-value     | Regulation (Fold-Change) | Regulation            | Gene Ontology (GO) Accession number | GO Biological Process                                       |
|---------------|-----------------------------|------------------|-------------|--------------------------|-----------------------|-------------------------------------|-------------------------------------------------------------|
| 2334052       | ENST00000458657             | C1orf228         | 0.000130811 | -1.17864                 | Control down vs N-RAS |                                     |                                                             |
| 3934729       | ENST00000397850             | ITGB2            | 3.94E-05    | -1.17799                 | Control down vs N-RAS | GO:0006915                          | apoptotic process                                           |
| 3944882       | NM_002305                   | LGALS1           | 0.000456275 | -1.17503                 | Control down vs N-RAS | GO:0006915                          | apoptotic process                                           |
| 3735752       | ENST00000436233             | SEC14L1          | 0.000140686 | -1.16914                 | Control down vs N-RAS | GO:0006810                          | transport                                                   |
| 3835814       | ENST00000252483             | PVRL2            | 4.39E-05    | -1.16738                 | Control down vs N-RAS | GO:0001675                          | acrosome assembly                                           |
| 3751590       | NM_032854                   | CORO6            | 0.000180066 | -1.16286                 | Control down vs N-RAS | GO:0030036                          | actin cytoskeleton organization                             |
| 2376799       | ENST00000367120             | IKBKE            | 0.000109021 | -1.15895                 | Control down vs N-RAS | GO:0002756                          | MyD88-independent toll-like receptor signaling pathway      |
| 4050590       | NM_006647                   | NOXA1            | 0.000528186 | -1.1553                  | Control down vs N-RAS | GO:0006801                          | superoxide metabolic process                                |
| 3564210       | NM_002863                   | PYGL             | 9.76E-05    | -1.1544                  | Control down vs N-RAS | GO:0005975                          | carbohydrate metabolic process                              |
| 3351564       | ENST00000361417             | PHLDB1           | 0.000176723 | -1.15097                 | Control down vs N-RAS |                                     |                                                             |
| 3837759       | NM_000836                   | GRIN2D           | 0.000109386 | -1.149                   | Control down vs N-RAS | GO:0001964                          | startle response                                            |
| 3771068       | NM_033452                   | TRIM47           | 4.17E-05    | -1.14562                 | Control down vs N-RAS |                                     |                                                             |
| 3977067       | ENST00000376327             | PLP2             | 0.000549644 | -1.14185                 | Control down vs N-RAS | GO:0006811                          | ion transport                                               |
| 3962839       | NM_173050                   | SCUBE1           | 0.000294511 | -1.13114                 | Control down vs N-RAS | GO:0006954                          | inflammatory response                                       |
| 3709244       | NM_001005273                | CHD3             | 0.000123369 | -1.10941                 | Control down vs N-RAS | GO:0006351                          | transcription, DNA-dependent                                |
| 3844021       | ---                         | ---              | 0.000556388 | 1.11394                  | Control up vs N-RAS   |                                     |                                                             |
| 2747190       | NM_001040261                | DCLK2            | 0.000550545 | 1.13271                  | Control up vs N-RAS   | GO:0035556                          | intracellular signal transduction                           |
| 3831274       | ---                         | ---              | 0.000655978 | 1.14386                  | Control up vs N-RAS   |                                     |                                                             |
| 2318656       | NM_016831                   | PER3             | 0.00011279  | 1.15995                  | Control up vs N-RAS   | GO:0000122                          | negative regulation of transcription from RNA polymerase II |
| 3233322       | NM_017782                   | FAM208B          | 0.00021648  | 1.17167                  | Control up vs N-RAS   |                                     |                                                             |
| 2420681       | NM_018298                   | MCOLN3           | 5.54E-05    | 1.19411                  | Control up vs N-RAS   | GO:0007626                          | locomotory behavior                                         |
| 3088213       | NM_022071                   | SH2D4A           | 0.000216166 | 1.19634                  | Control up vs N-RAS   | GO:0010923                          | negative regulation of phosphatase activity                 |
| 2345239       | NR_026985                   | LOC339524        | 0.000573727 | 1.22773                  | Control up vs N-RAS   | GO:0015014                          | heparan sulfate proteoglycan biosynthetic process           |
| 2995076       | NM_001080529                | WIPF3            | 0.000551762 | 1.22818                  | Control up vs N-RAS   | GO:0007275                          | multicellular organismal development                        |
| 3975893       | NM_014735                   | PHF16            | 0.000530995 | 1.2391                   | Control up vs N-RAS   | GO:0043966                          | histone H3 acetylation                                      |
| 3173880       | NM_004817                   | TJP2             | 8.36E-05    | 1.23927                  | Control up vs N-RAS   | GO:0006915                          | apoptotic process                                           |
| 2481379       | NM_006872                   | GTF2A1L          | 0.000323627 | 1.24136                  | Control up vs N-RAS   | GO:0006355                          | regulation of transcription, DNA-dependent                  |
| 3507003       | NM_153371                   | LNX2             | 0.000598753 | 1.2472                   | Control up vs N-RAS   | GO:0051260                          | protein homooligomerization                                 |
| 3132940       | NM_020476                   | ANK1             | 2.91E-05    | 1.24926                  | Control up vs N-RAS   | GO:0006887                          | exocytosis                                                  |

| Transcript ID | Gene Assignment (RefSeq ID) | Common Gene Name | p-value     | Regulation (Fold-Change) | Regulation          | Gene Ontology (GO) Accession number | GO Biological Process                                       |
|---------------|-----------------------------|------------------|-------------|--------------------------|---------------------|-------------------------------------|-------------------------------------------------------------|
| 2933536       | NM_020245                   | TULP4            | 0.00016489  | 1.25744                  | Control up vs N-RAS | GO:0006355                          | regulation of transcription, DNA-dependent                  |
| 3901696       | ENST00000432802             | ACSS1            | 2.49E-05    | 1.27003                  | Control up vs N-RAS | GO:0006069                          | ethanol oxidation                                           |
| 2584787       | NM_014900                   | COBLL1           | 0.000489745 | 1.28515                  | Control up vs N-RAS |                                     |                                                             |
| 3858659       | NM_032139                   | ANKRD27          | 0.000199712 | 1.31289                  | Control up vs N-RAS | GO:0045022                          | early endosome to late endosome transport                   |
| 3403595       | NM_016184                   | CLEC4A           | 0.000489718 | 1.33576                  | Control up vs N-RAS | GO:0007155                          | cell adhesion                                               |
| 3064158       | ENST00000462107             | TFR2             | 0.000245542 | 1.34614                  | Control up vs N-RAS | GO:0006508                          | proteolysis                                                 |
| 3517251       | ENST00000305425             | DACH1            | 0.0003909   | 1.34645                  | Control up vs N-RAS | GO:0007275                          | multicellular organismal development                        |
| 3419641       | BC053903                    | SRGAP1           | 0.000334893 | 1.37042                  | Control up vs N-RAS | GO:0007264                          | small GTPase mediated signal transduction                   |
| 3138204       | NM_004820                   | CYP7B1           | 0.000444799 | 1.37709                  | Control up vs N-RAS | GO:0006699                          | bile acid biosynthetic process                              |
| 3844744       | NM_214710                   | PRSS57           | 0.000394019 | 1.38612                  | Control up vs N-RAS | GO:0006508                          | proteolysis                                                 |
| 2880051       | ENST00000394413             | PPP2R2B          | 3.70E-05    | 1.38893                  | Control up vs N-RAS | GO:0006915                          | apoptotic process                                           |
| 2660617       | NM_000564                   | IL5RA            | 0.000514733 | 1.40576                  | Control up vs N-RAS | GO:0002437                          | inflammatory response to antigenic stimulus                 |
| 2349129       | NM_001400                   | S1PR1            | 0.000285958 | 1.44731                  | Control up vs N-RAS | GO:0001525                          | angiogenesis                                                |
| 3301713       | NM_013314                   | BLNK             | 0.000681544 | 1.45722                  | Control up vs N-RAS | GO:0006954                          | inflammatory response                                       |
| 2585400       | ENST00000409672             | SCN9A            | 2.93E-05    | 1.47085                  | Control up vs N-RAS | GO:0006814                          | sodium ion transport                                        |
| 2558736       | NM_001617                   | ADD2             | 0.000596648 | 1.50901                  | Control up vs N-RAS | GO:0006811                          | ion transport                                               |
| 2557759       | NM_015463                   | CNRIP1           | 5.30E-05    | 1.54189                  | Control up vs N-RAS |                                     |                                                             |
| 2781138       | NM_016269                   | LEF1             | 4.55E-05    | 1.66127                  | Control up vs N-RAS | GO:0000122                          | negative regulation of transcription from RNA polymerase II |
| 4044363       | ENST00000536471             | CNR2             | 0.000676923 | 1.82158                  | Control up vs N-RAS | GO:0001975                          | response to amphetamine                                     |
| 3657253       | NM_016633                   | AHSP             | 3.27E-05    | 2.28921                  | Control up vs N-RAS | GO:0006457                          | protein folding                                             |
| 2997789       | ENST00000447769             | GPR141           | 0.00068832  | 2.31209                  | Control up vs N-RAS | GO:0007186                          | G-protein coupled receptor signaling pathway                |
| 2727587       | NM_000222                   | KIT              | 8.43E-06    | 2.37021                  | Control up vs N-RAS | GO:0000187                          | activation of MAPK activity                                 |

## Supplemental Figures

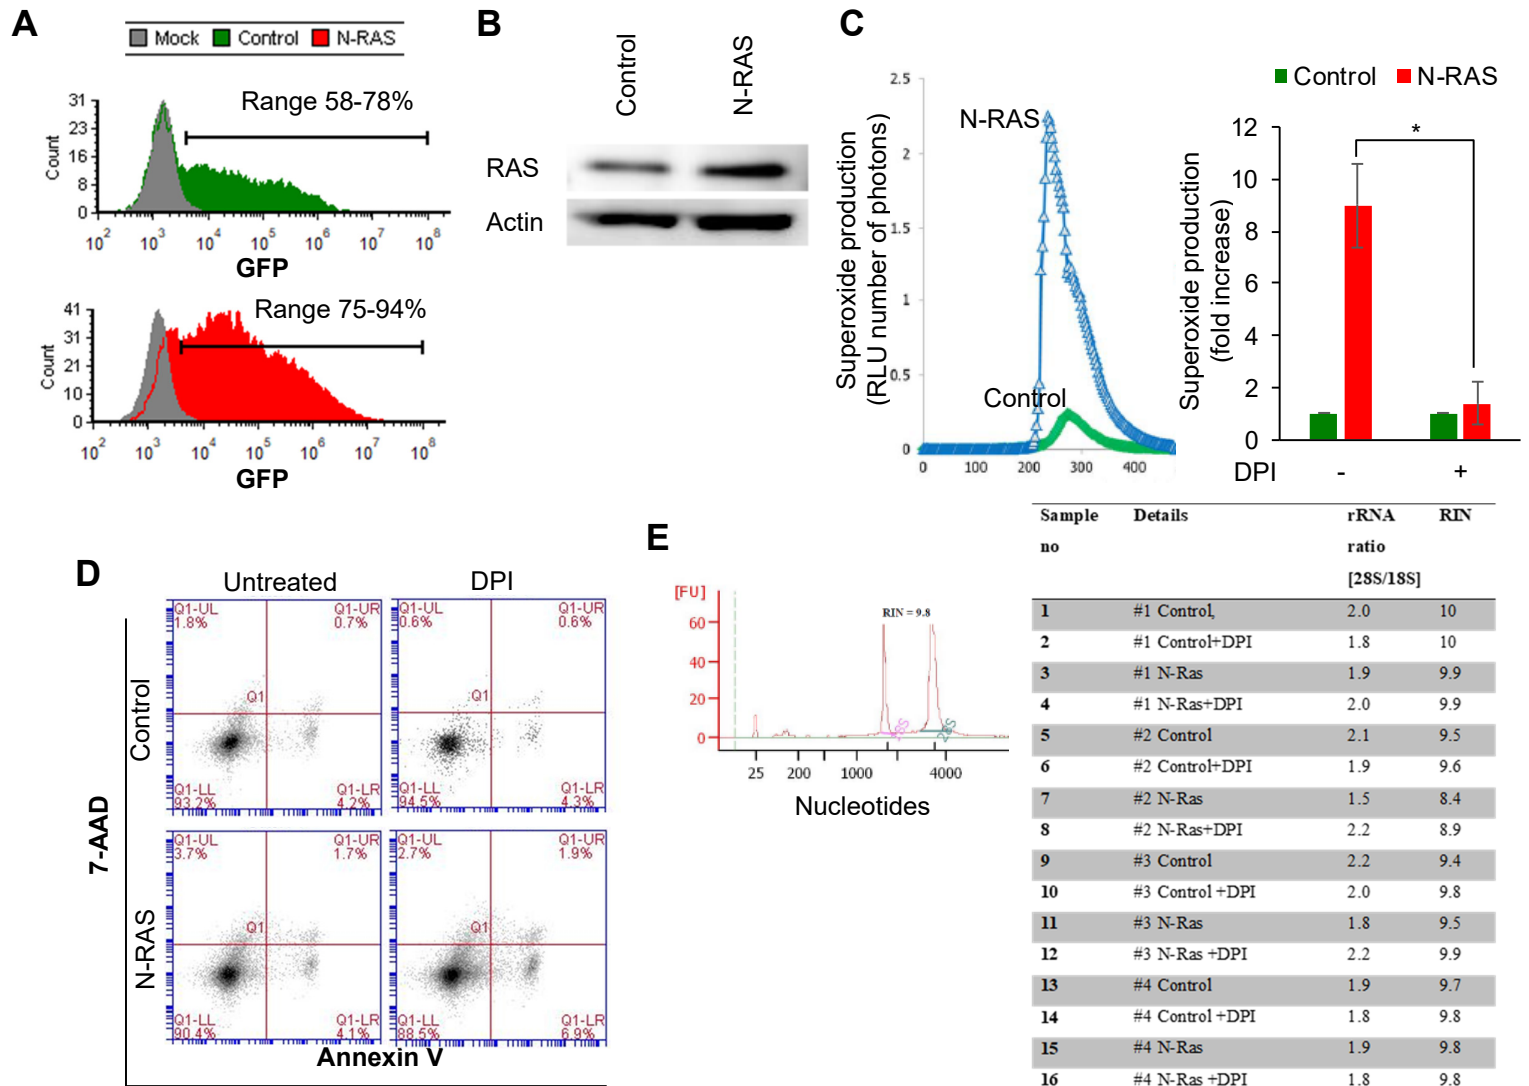

**Supplemental Fig. S1. Infection of human hematopoietic stem progenitor cells with mutant N-RAS<sup>G12D</sup>.**

(A) Representative flow cytometric histograms showing percentage of CD34<sup>+</sup> HSPC cells expressing GFP in cells infected with GFP alone (Control) or N-RAS<sup>G12D</sup> (N-RAS)(n=7) analysed on day 3 of culture. GFP Histograms were gated to exclude cell debris based on forward and side scatter. Background auto fluorescence was established using HSPC subjected to the equivalent retroviral infection procedure but in the absence of retrovirus (mock). (B) Example western blot analysis of N-RAS protein expression in infected HSPCs. Actin was used as a loading control. (C) Superoxide production was measured using Diogenes<sup>TM</sup> (example chemiluminescent trace, left panel) in the presence or absence of NOX family inhibitor (diphenyleneiodonium, DPI) on day 7 (summary data (n=5), right panel). Cells were exposed to 100 nM DPI for 24 h prior to these measurements. (D) Bivariate flow cytometric data showing the survival of N-RAS infected HSPC compared to cells not treated with 100nm DPI (untreated) following 24 h incubation. Plots were gated to exclude small cell debris based on forward and side scatter. Quadrants delimit background auto fluorescence. (E) *Left panel*: Example Agilent Bioanalyzer 2100 electropherogram showing high RIN (RNA Integrity Number) indicating high quality RNA. *Right Panel*: Summary of RIN values and 28S/18S rRNA ratios. # indicates experimental replicate number. \* denotes p<0.05, statistical significance was determined by Student's t-test.

**A**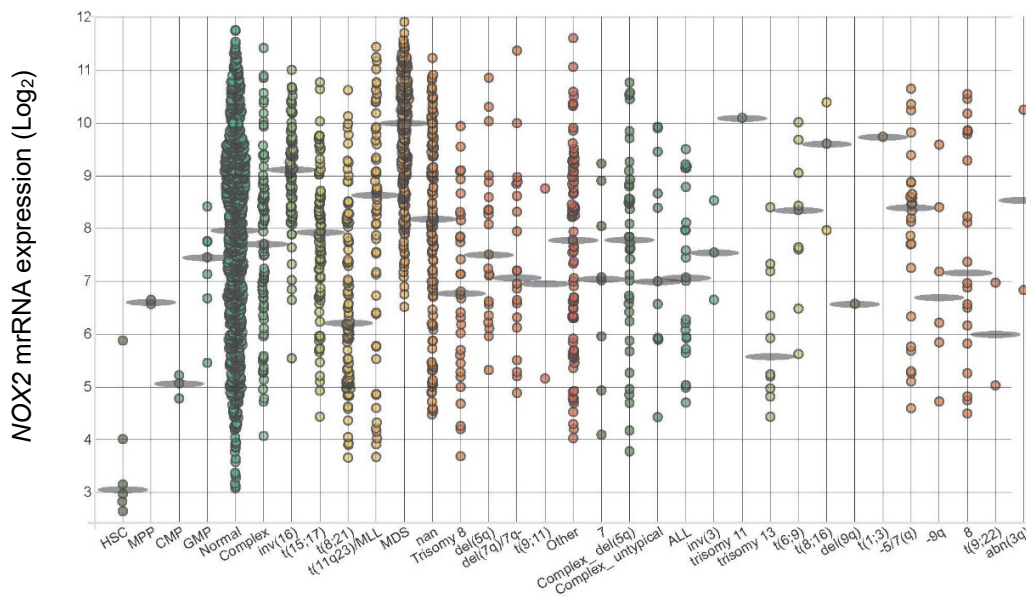**B**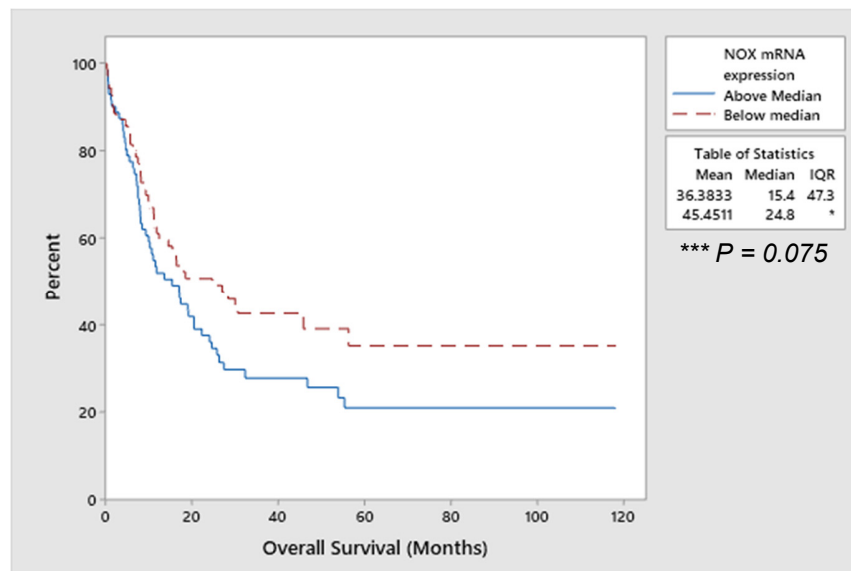

### **Supplemental Fig. S2. Over expression of *NOX2* mRNA in AML.**

(A) *NOX2* (*CYBB*) mRNA expression data analysed using Bloodspot (<http://servers.binf.ku.dk/bloodspot/>) (2) and published online datasets. Human normal hematopoiesis data derived from GSE42519 (3). Data from Human AML blasts are derived from GSE13159 (4), GSE15434 (5), GSE61804 (6), GSE14468 (7) and The Cancer Genome Atlas (TCGA) (8). (B) Overall survival of AML patients stratified according to *NOX2* expression level using the AML TCGA dataset (excluding APL). \*\*\*Statistical significance analysed by Log-Rank. HSC, Hematopoietic stem cell Lin<sup>-</sup> CD34<sup>+</sup> CD38<sup>-</sup> CD90<sup>+</sup> CD45RA<sup>-</sup>; MPP, Multipotential progenitors Lin<sup>-</sup> CD34<sup>+</sup> CD38<sup>-</sup> CD90<sup>-</sup> 45RA<sup>-</sup>; CMP, Common myeloid progenitors cell Lin<sup>-</sup> CD34<sup>+</sup> CD38<sup>+</sup> CD45RA<sup>-</sup> CD123<sup>+</sup>; GMP, Granulocyte monocyte progenitors Lin<sup>-</sup> CD34<sup>+</sup> CD38<sup>+</sup> CD45RA<sup>+</sup> CD123<sup>+</sup>. Human AML subtype definitions are shown over-page.

|                    |                                      |
|--------------------|--------------------------------------|
| Normal             | AML with Normal karyotype            |
| Complex            | AML with Complex karyotype           |
| inv(16)            | AML with inv(16)                     |
| t(15;17)           | AML with t(15;17)                    |
| t(8;21)            | AML with t(8;21)                     |
| t(11q23)/MLL       | AML with t(11q23)/MLL                |
| MDS                | MDS                                  |
| nan                | AML with no karyotype information    |
| Trisomy 8          | AML with Trisomy 8                   |
| del(5q)            | AML with del(5q)                     |
| del(7q)/7q-        | AML with del(7q)/7q-                 |
| t(9;11)            | AML with t(9;11)                     |
| Other              | AML with Other abnormalities         |
| 7                  | AML with +7                          |
| Complex_ del(5q)   | AML with Complex del(5q)             |
| Complex_ untypical | AML with Complex untypical karyotype |
| ALL                | ALL                                  |
| inv(3)             | AML with inv(3)                      |
| trisomy 11         | AML with trisomy 11                  |
| trisomy 13         | AML with trisomy 13                  |
| t(6;9)             | AML with t(6;9)                      |
| t(8;16)            | AML with t(8;16)                     |
| del(9q)            | AML with del(9q)                     |
| t(1;3)             | AML with t(1;3)                      |
| -5/7(q)            | AML with -5/7(q)                     |
| -9q                | AML with -9q                         |
| 8                  | AML with +8                          |
| t(9;22)            | AML with t(9;22)                     |
| abn(3q)            | AML with abn(3q)                     |

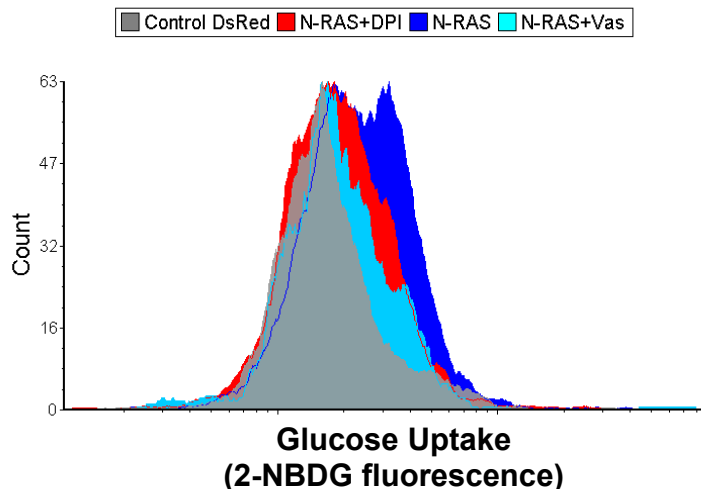

**Supplemental Fig. S3. Glucose uptake in HSPC expressing mutant RAS.**

Representative flow cytometric histograms showing changes in glucose uptake in DsRed<sup>+</sup> N-RAS<sup>G12D</sup> cells compared to control or cells treated with NOX inhibitors (100nm DPI; 5  $\mu$ M VAS2870). Following infection, CD34<sup>+</sup> cells were cultured for 3 further days (day 6 of development) at an initial seeding density of  $1.5 \times 10^5$  cells/mL without growth factors. Glucose uptake was assayed at the single cell level using the glucose bioprobe 2-(N-(7-nitrobenz-2-oxa-1,3-diazol-4-yl) amino)-2-D-deoxyglucose (2-NBDG) coupled with flow cytometry. Data were gated to exclude cell debris based on FSC/SSC.

2-NBDG is a fluorescent glucose derivative that is transported into the cell by glucose transporters and is phosphorylated to 2-NBDG-6-phosphate before being broken down into non-fluorescent derivatives. 2-NBDG emits fluorescence at a wavelength of 542nm which has a spectral overlap with GFP emission. Therefore, HSPC were alternatively infected with the PINCO retroviral expression vector that was modified to co-express DsRed instead of GFP.

**A**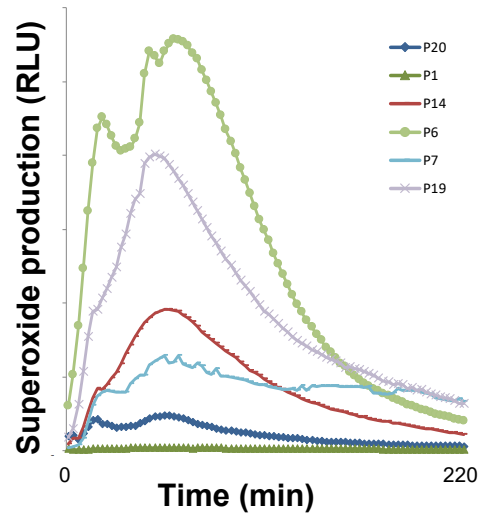**B**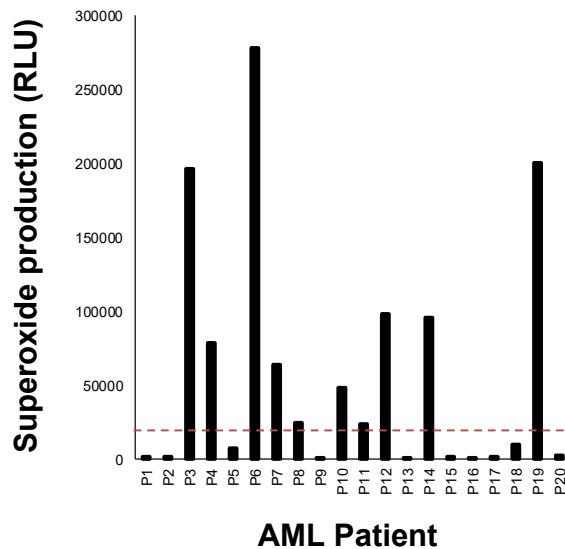

**Supplemental Fig. S4. Validation of ROS production in AML patient blasts for the analysis of global biochemicals using ultra-high performance liquid chromatography-tandem MS (UPLC-MS/MS) and GC-MS.**

Superoxide production was assayed from viable AML patients blasts *ex vivo* using Diogenes™ and chemiluminescence was detected using a Hidex® Chameleon luminometer every 5 min for up to 3 h. **(A)** Example chemiluminescent traces of a selection of AML blasts showing levels of superoxide production **from each patient (P)**. **(B)** Summary data of superoxide production in 20 primary AML blasts. AML patient blasts were stratified according to superoxide production above (AML-ROS<sup>High</sup>) or below (AML-ROS<sup>Low</sup>) the median (dotted line). RLU, Relative Light Units.



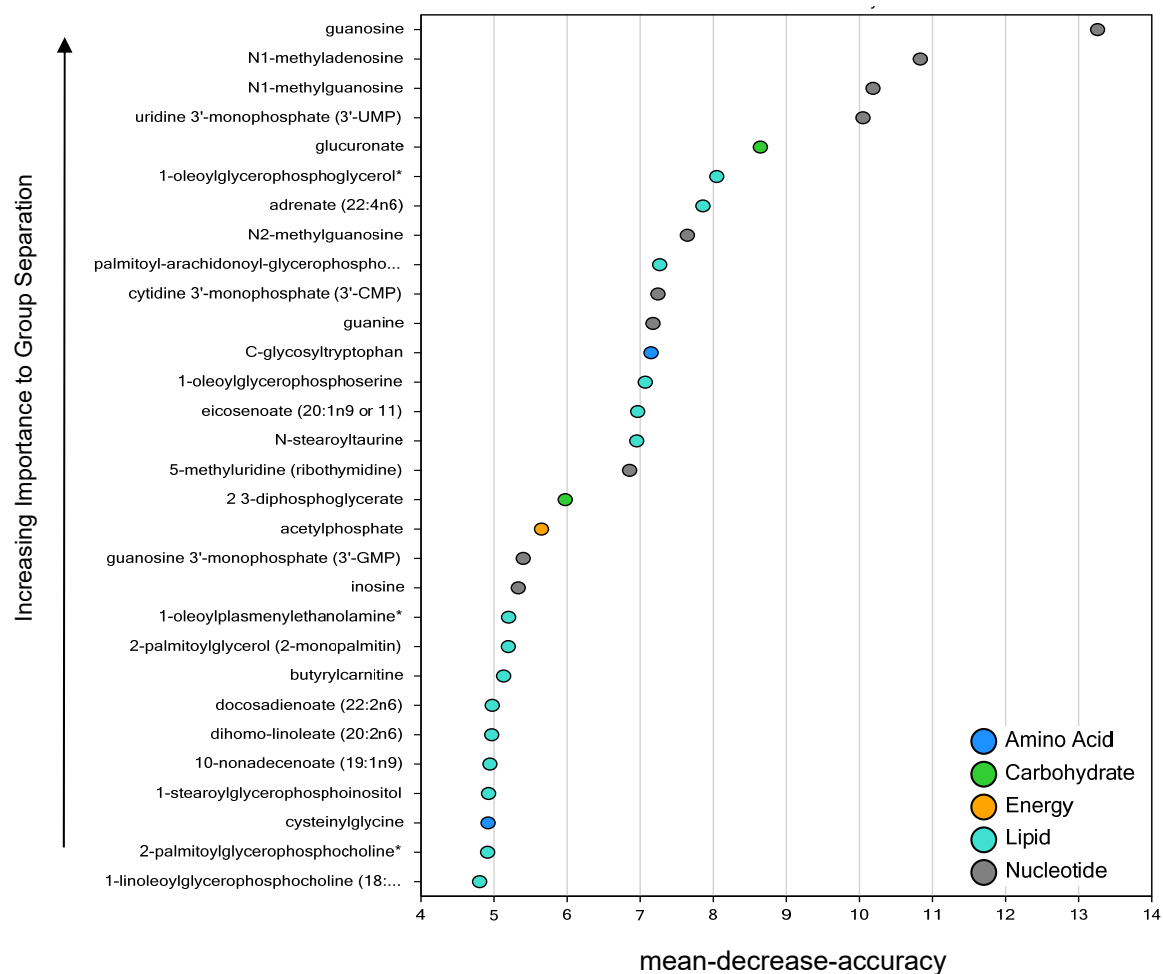

**Supplemental Fig. S5. Random Forest analysis of AML ROS<sup>high</sup> compared to AML ROS<sup>Low</sup>.**

Random Forest classification of AML-ROS<sup>High</sup> compared to AML-ROS<sup>Low</sup> gave a predictive accuracy of 85% based on their metabolic profiles which is better than random chance alone (50% accuracy for two groups), indicating that differences in biochemical profiles between groups may be sufficient for biomarker discovery.

**A**

| Biochemical Name                                           | Platform        | Comp ID | KEGG                   | HMDB                      | PubChem | GOX 10<br>Ctrl |
|------------------------------------------------------------|-----------------|---------|------------------------|---------------------------|---------|----------------|
| fructose-6-phosphate                                       | LC/MS polar     | 12021   | <a href="#">C05345</a> | <a href="#">HMDB00124</a> | 69507   | 0.71           |
| Isobar: fructose 1,6-diphosphate, glucose 1,6-diphosphate, | LC/MS neg       | 46896   |                        |                           |         | 1.09           |
| dihydroxyacetone phosphate (DHAP)                          | LC/MS pos early | 15522   | <a href="#">C00111</a> | <a href="#">HMDB01473</a> | 668     | 0.85           |
| 3-phosphoglycerate                                         | LC/MS neg       | 1414    | <a href="#">C00597</a> | <a href="#">HMDB00807</a> | 724     | 0.56           |
| pyruvate                                                   | LC/MS polar     | 22250   | <a href="#">C00022</a> | <a href="#">HMDB00243</a> | 1060    | 1.29           |
| lactate                                                    | LC/MS neg       | 527     | <a href="#">C00186</a> | <a href="#">HMDB00190</a> | 612     | 0.87           |
| glycerate                                                  | LC/MS polar     | 1572    | <a href="#">C00258</a> | <a href="#">HMDB00139</a> | 752     | 1.16           |
| 6-phosphogluconate                                         | LC/MS neg       | 15442   | <a href="#">C00345</a> | <a href="#">HMDB01316</a> | 91493   | 1.75           |
| ribose 1-phosphate                                         | LC/MS polar     | 1763    | <a href="#">C00620</a> | <a href="#">HMDB01489</a> | 439236  | 0.87           |
| 5-phosphoribosyl diphosphate (PRPP)                        | LC/MS neg       | 36840   | <a href="#">C00119</a> | <a href="#">HMDB00280</a> | 7339    | 0.90           |
| sedoheptulose-7-phosphate                                  | LC/MS neg       | 35649   | <a href="#">C05382</a> | <a href="#">HMDB01068</a> | 616     | 3.32           |

**B (i)**

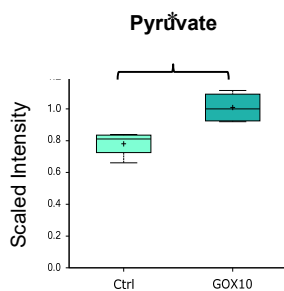

**(ii)**

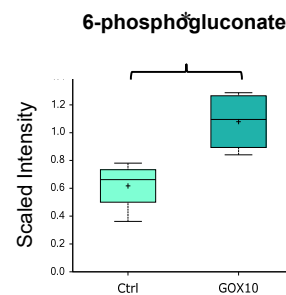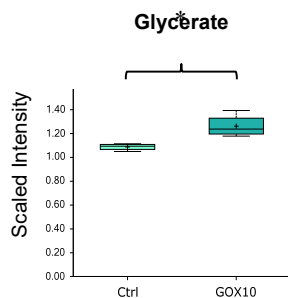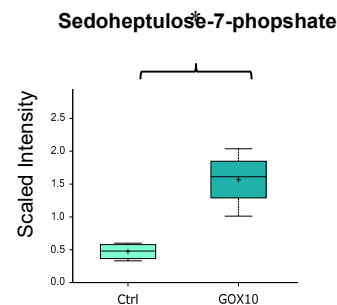

**Supplemental Fig. S6. Treatment of the Mv4;11 AML cell line with H<sub>2</sub>O<sub>2</sub> increases biochemical levels within the pentose phosphate pathway.**

Data from biochemical profiling of Mv4;11 AML cells treated with 10 mU/mL glucose oxidase (GOX) or vehicle control (Ctrl) for 24hrs at 37°C followed by LC/MS analysis by Metabolon™ (A) Heat map of statistically significant biochemicals in Glycolysis, Gluconeogenesis, and Pyruvate Metabolism analysed by Welch's two sample t-Test. Red: indicates significant difference ( $p \leq 0.05$ ) between the groups shown; metabolite ratio of  $\geq 1.00$ . Non-coloured text and cell: mean values are not significantly different for that comparison. (B) Levels of significant biochemicals normalised to total protein in (i) Glycolysis (ii) Pentose Phosphate Pathway (PPP).

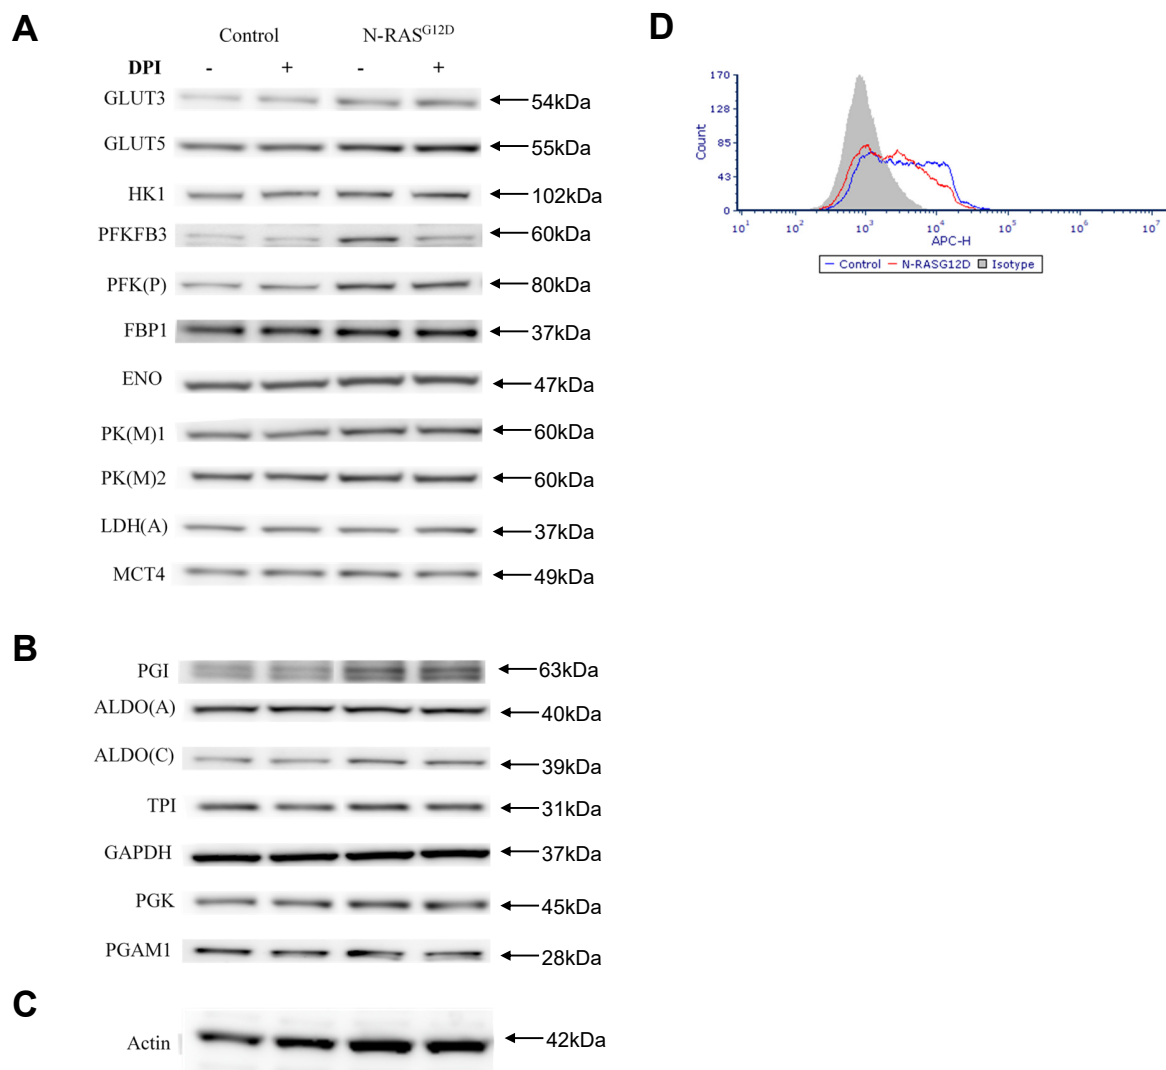

**Supplemental Fig. S7. N-RAS<sup>G12D</sup> and ROS dependent changes in protein expression of glycolytic enzymes.**

Human HSPC control and N-RAS<sup>G12D</sup> were incubated for 24h in the presence or absence of DPI (100nM) followed by whole cell protein extraction. Western blots showing expression (A) of ROS responsive genes identified in Figure 1C. (B) We also determined the protein expression of other glycolytic genes to determine if expression was affected by any non-transcriptional mechanisms. GLUT3 (SLC2A3), GLUT5 (SLC2A5), HK1, PGI (phosphoglucose isomerase), PFKFB3, PFK(P), FBP1, ALDO(A) (aldolase A), ALDO(C) (aldolase C), TPI (triphosphate isomerase), GAPDH (glyceraldehyde phosphate dehydrogenase), PGK (phosphoglycerate kinase), PGAM1 (phosphoglycerate mutase 1), ENO, PK(M)1 (pyruvate kinase muscle 1), PK(M)2 (pyruvate kinase muscle 2), LDH(A) and MCT4 (SLC16A3). (C) Actin was used as a loading control. (D) Glut5 cell surface protein expression measured by an indirect stain using anti-mouse IgG-APC. Note, no detectable expression was observed for Glut3. Gray filled histogram shows background isotype control.

**A**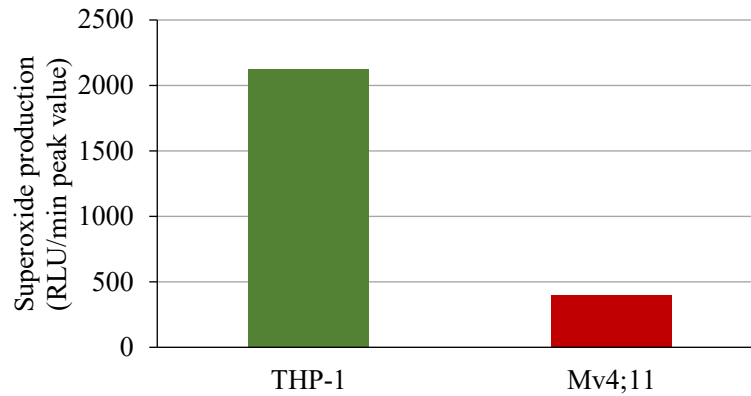**B**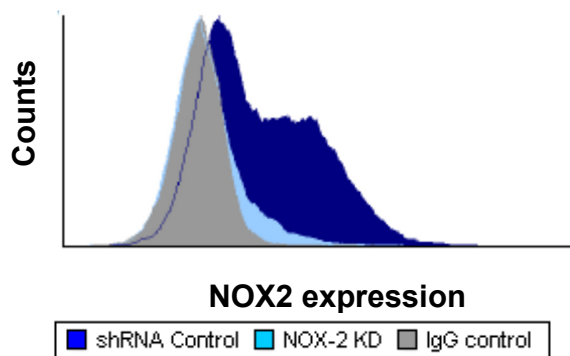**C**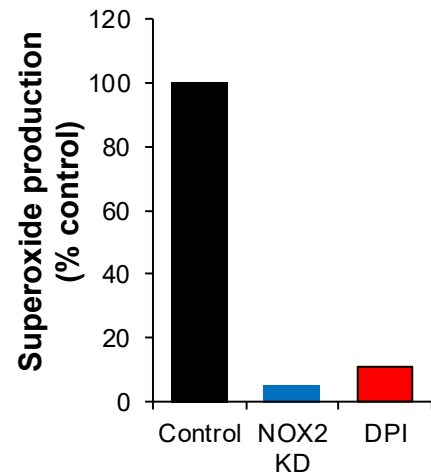

**Supplemental Fig. S8. Validation of THP-1 AML cell line in which ROS production is ablated following NOX2 Knock down.**

(A) Extracellular superoxide production in THP-1 and Mv4;11 AML cell lines. Peak superoxide production (relative luminescent units/min (RLU/min) measured using Diogenes™. (B) Cell surface NOX-2 expression in THP-1 cells transduced with Mission® Lentiviral shRNA vectors targeting non-mammalian gene (shRNA Control) or NOX2 (NOX2-KD) using anti-NOX2-PE conjugated antibody and compared to IgG1 isotype control. (C) Superoxide production (normalised to shRNA control) assayed using Diogenes™. Control THP-1 cells were also treated with DPI (100nM) overnight at 37°C.

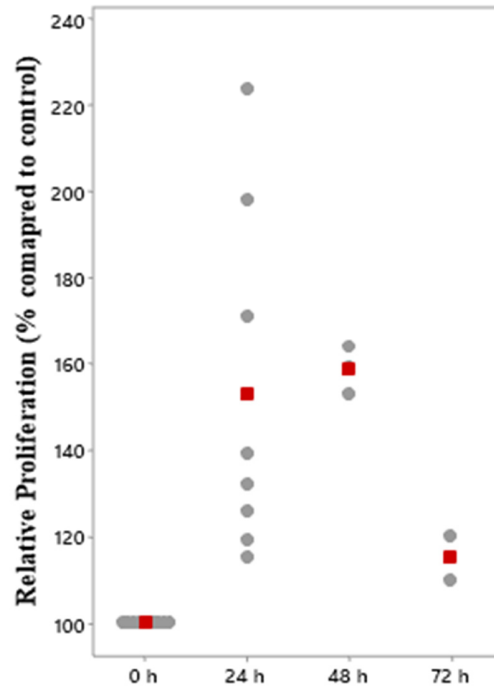

**Supplemental Fig. S9. Hydrogen peroxide (GOX) induces proliferation in Mv4;11 leukemia cells.**

Percentage proliferation (normalised to control) of Mv4;11 cells treated with GOX for 24 h, 48 h or 72 h. Individual data points are shown as gray circles. Mean is indicated by red square. Note: proliferative response diminishes over time as GOX activity decreases.

**A**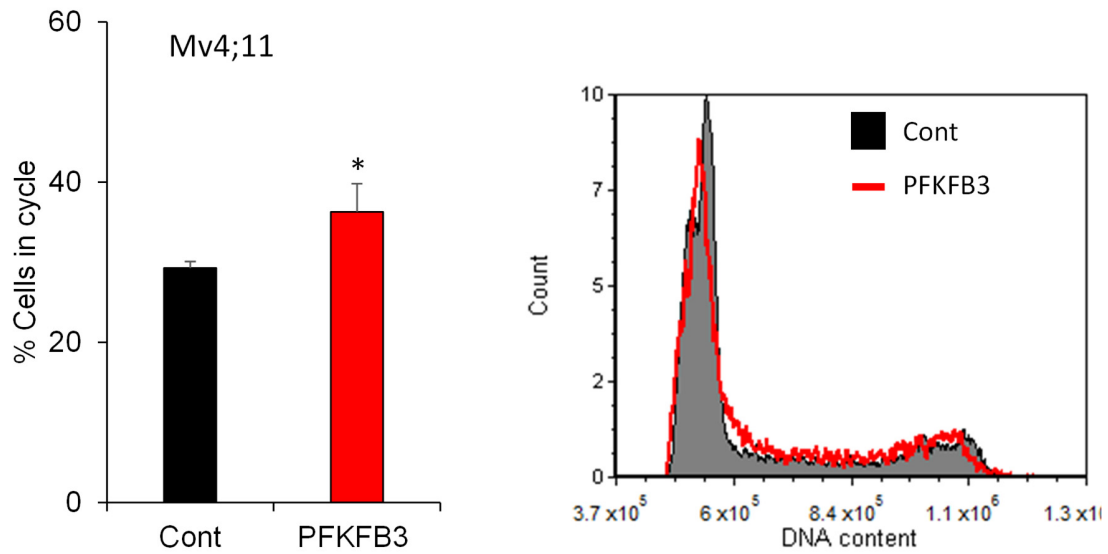**B**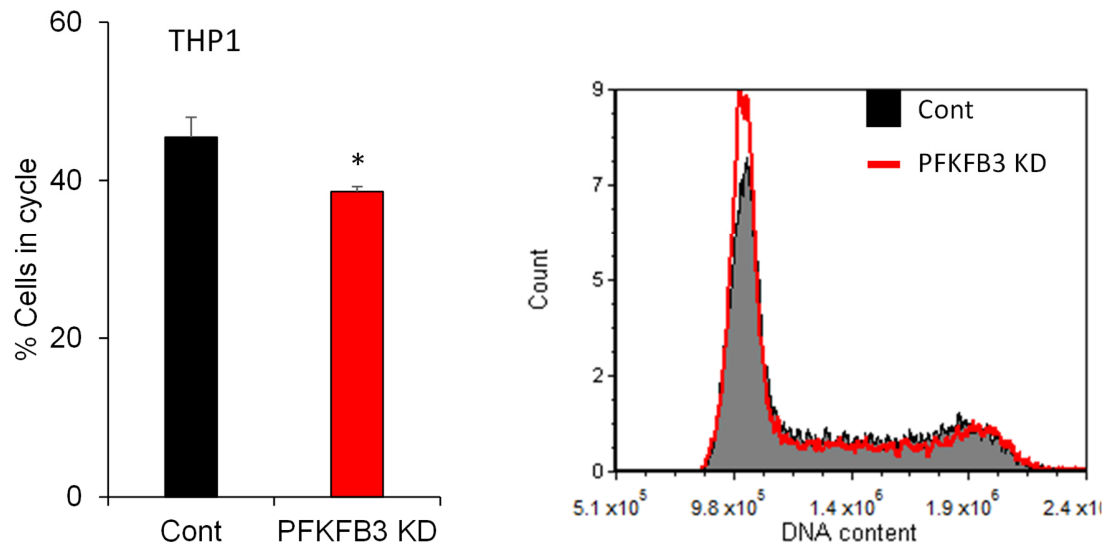

**Supplemental Fig. S10. Effect of PFKFB3 overexpression and PFKFB3 knockdown on cell cycle distribution**

(A) Effect of PFKFB3 overexpression on the cell cycle distribution of Mv4;11 cells with representative data in RH panel (n=3; p<0.05). (B) Effect of PFKFB3 knockdown on the cell cycle distribution of THP1 cells with representative data in RH panel (n=3; p<0.05).

**A** Mv4;11

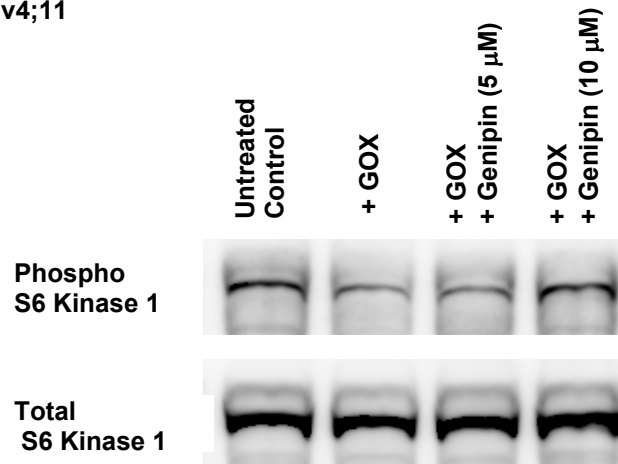

**B**

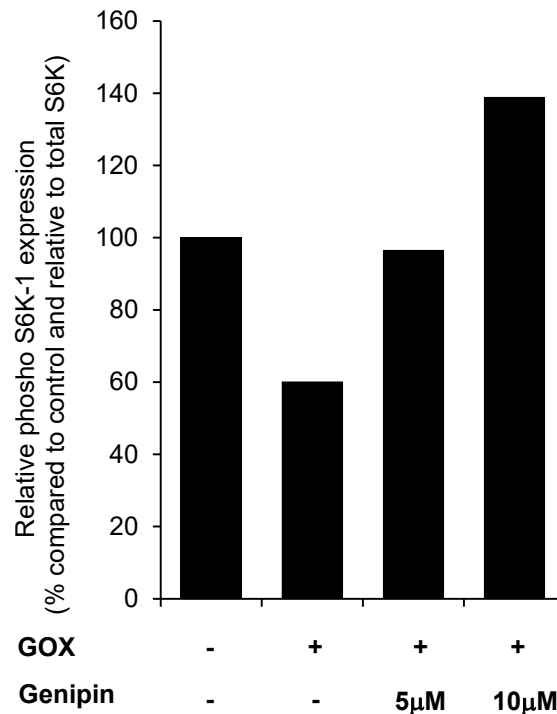

**Supplemental Fig. S11. ROS induced changes in p-AMPK / mTORC1 pathway**

(A) Western blot showing downstream activation of p-AMPK pathway upon 1 h pre-treatment of Mv4;11 cells with the UCP2 inhibitor Genipin (0-10 μM) followed by GOX treatment (20mU/mL) for 24 h. Membrane was re-probed with Total S6 Kinase 1. (B) Relative protein expression (as measured by pixel densitometry of equivalent regions of interest (ROI) between different samples on the same blot then normalised to total S6 Kinase and untreated control (n=1).

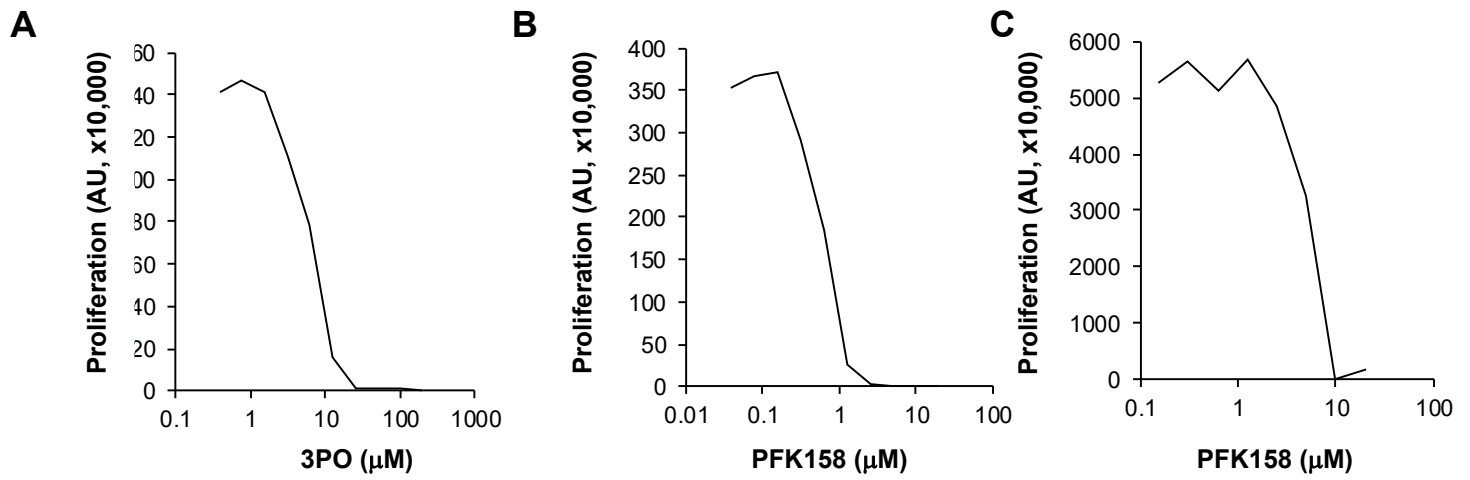

**Supplemental Fig. S12. Determination of EC50 of 3PO and PFK158 on AML cell lines.**

Mv4;11 cells were seeded at  $1 \times 10^5$  and cultured for 24h in the presence of (A) 3PO or (B) PFK158 and subsequently assayed using CellTiter-Glo™ (n=1). (C) Similarly, THP-1 were seeded at  $1 \times 10^5$  and cultured for 24h in the presence of PFK158 (n=1).



## Reference List

- (1) Grignani F, Kinsella T, Mencarelli A, Valtieri M, Riganelli D, Grignani F, et al. High-efficiency gene transfer and selection of human hematopoietic progenitor cells with a hybrid EBV/retroviral vector expressing the green fluorescence protein. *Cancer Res* 1998;**58**:14-9.
- (2) Bagger FO, Sasivarevic D, Sohi SH, Laursen LG, Pundhir S, Sonderby CK, et al. BloodSpot: a database of gene expression profiles and transcriptional programs for healthy and malignant haematopoiesis. *Nucleic Acids Res* 2016;**44**:D917-D924.
- (3) Rapin N, Bagger FO, Jendholm J, Mora-Jensen H, Krogh A, Kohlmann A, et al. Comparing cancer vs normal gene expression profiles identifies new disease entities and common transcriptional programs in AML patients. *Blood* 2014;**123**:894-904.
- (4) Kohlmann A, Kipps TJ, Rassenti LZ, Downing JR, Shurtleff SA, Mills KI, et al. An international standardization programme towards the application of gene expression profiling in routine leukaemia diagnostics: the Microarray Innovations in LEukemia study prephase. *Br J Haematol* 2008;**142**:802-7.
- (5) Klein HU, Ruckert C, Kohlmann A, Bullinger L, Thiede C, Haferlach T, et al. Quantitative comparison of microarray experiments with published leukemia related gene expression signatures. *BMC Bioinformatics* 2009;**10**:422.
- (6) Metzelder SK, Michel C, von BM, Rehberger M, Hessmann E, Inselmann S, et al. NFATc1 as a therapeutic target in FLT3-ITD-positive AML. *Leukemia* 2015;**29**:1470-7.
- (7) Wouters BJ, Lowenberg B, Erpelinck-Verschueren CA, van Putten WL, Valk PJ, Delwel R. Double CEBPA mutations, but not single CEBPA mutations, define a subgroup of acute myeloid leukemia with a distinctive gene expression profile that is uniquely associated with a favorable outcome. *Blood* 2009;**113**:3088-91.
- (8) Ley TJ, Miller C, Ding L, Raphael BJ, Mungall AJ, Robertson A, et al. Genomic and epigenomic landscapes of adult de novo acute myeloid leukemia. *N Engl J Med* 2013;**368**:2059-74.
